# Supplementary material for: Changes in marriage, divorce and births during the COVID-19 pandemic in Japan
Source: PubMed Central journal article supplement — BMJ Glob Health. 2022 May 12;7(5):e007866. doi: 10.1136/bmjgh-2021-007866 (PMC9108437; doi:10.1136/bmjgh-2021-007866), 2022-05-12
Supplement: bmjgh-2021-007866supp001.pdf [file bmjgh-2021-007866supp001.pdf]

## Ghaznavi et al. Changes in Marriage, Divorce, and Births During the COVID-19 Pandemic in Japan.

### Online Supplementary Material.

#### Table of Contents

| Table/Figure | Title                                                                                                                                                    | Page  |
|--------------|----------------------------------------------------------------------------------------------------------------------------------------------------------|-------|
| eTable 1     | Observed and expected daily number of <b>marriages</b> , by month, with 95% prediction intervals between January 2017 and May 2021, Japan.               | 2-3   |
| eTable 2     | Observed and expected daily number of <b>marriages</b> , by month, with 95% prediction intervals between January 2017 and May 2021, Chubu.               | 4-5   |
| eTable 3     | Observed and expected daily number of <b>marriages</b> , by month, with 95% prediction intervals between January 2017 and May 2021, Chugoku.             | 6-7   |
| eTable 4     | Observed and expected daily number of <b>marriages</b> , by month, with 95% prediction intervals between January 2017 and May 2021, Hokkaido.            | 8-9   |
| eTable 5     | Observed and expected daily number of <b>marriages</b> , by month, with 95% prediction intervals between January 2017 and May 2021, Kansai.              | 10-11 |
| eTable 6     | Observed and expected daily number of <b>marriages</b> , by month, with 95% prediction intervals between January 2017 and May 2021, Kanto.               | 12-13 |
| eTable 7     | Observed and expected daily number of <b>marriages</b> , by month, with 95% prediction intervals between January 2017 and May 2021, Kyushu & Okinawa.    | 14-15 |
| eTable 8     | Observed and expected daily number of <b>marriages</b> , by month, with 95% prediction intervals between January 2017 and May 2021, Shikoku.             | 16-17 |
| eTable 9     | Observed and expected daily number of <b>marriages</b> , by month, with 95% prediction intervals between January 2017 and May 2021, Tohoku.              | 18-19 |
| eTable 10    | Observed and expected daily number of <b>divorces</b> , by month, with 95% prediction intervals between January 2017 and May 2021, Japan.                | 20-21 |
| eTable 11    | Observed and expected daily number of <b>divorces</b> , by month, with 95% prediction intervals between January 2017 and May 2021, Chubu.                | 22-23 |
| eTable 12    | Observed and expected daily number of <b>divorces</b> , by month, with 95% prediction intervals between January 2017 and May 2021, Chugoku.              | 24-25 |
| eTable 13    | Observed and expected daily number of <b>divorces</b> , by month, with 95% prediction intervals between January 2017 and May 2021, Hokkaido.             | 26-27 |
| eTable 14    | Observed and expected daily number of <b>divorces</b> , by month, with 95% prediction intervals between January 2017 and May 2021, Kansai.               | 28-29 |
| eTable 15    | Observed and expected daily number of <b>divorces</b> , by month, with 95% prediction intervals between January 2017 and May 2021, Kanto.                | 30-31 |
| eTable 16    | Observed and expected daily number of <b>divorces</b> , by month, with 95% prediction intervals between January 2017 and May 2021, Kyushu & Okinawa.     | 32-33 |
| eTable 17    | Observed and expected daily number of <b>divorces</b> , by month, with 95% prediction intervals between January 2017 and May 2021, Shikoku.              | 34-35 |
| eTable 18    | Observed and expected daily number of <b>divorces</b> , by month, with 95% prediction intervals between January 2017 and May 2021, Tohoku.               | 36-37 |
| eTable 19    | Observed and expected daily number of <b>total births</b> , by month, with 95% prediction intervals between January 2017 and May 2021, Japan.            | 38-39 |
| eTable 20    | Observed and expected daily number of <b>total births</b> , by month, with 95% prediction intervals between January 2017 and May 2021, Chubu.            | 40-41 |
| eTable 21    | Observed and expected daily number of <b>total births</b> , by month, with 95% prediction intervals between January 2017 and May 2021, Chugoku.          | 42-43 |
| eTable 22    | Observed and expected daily number of <b>total births</b> , by month, with 95% prediction intervals between January 2017 and May 2021, Hokkaido.         | 44-45 |
| eTable 23    | Observed and expected daily number of <b>total births</b> , by month, with 95% prediction intervals between January 2017 and May 2021, Kansai.           | 46-47 |
| eTable 24    | Observed and expected daily number of <b>total births</b> , by month, with 95% prediction intervals between January 2017 and May 2021, Kanto.            | 48-49 |
| eTable 25    | Observed and expected daily number of <b>total births</b> , by month, with 95% prediction intervals between January 2017 and May 2021, Kyushu & Okinawa. | 50-51 |
| eTable 26    | Observed and expected daily number of <b>total births</b> , by month, with 95% prediction intervals between January 2017 and May 2021, Shikoku.          | 52-53 |
| eTable 27    | Observed and expected daily number of <b>total births</b> , by month, with 95% prediction intervals between January 2017 and May 2021, Tohoku.           | 54-55 |
| eFigure 1    | Observed and expected daily number of <b>first births</b> , by month, with 95% prediction intervals between January 2017 and May 2021, Japan.            | 56    |
| eFigure 2    | Observed and expected daily number of <b>subsequent births</b> , by month, with 95% prediction intervals between January 2017 and May 2021, Japan.       | 57    |

**eTable 1.** Observed and expected daily number of marriages, by month, with 95% prediction intervals between January 2017 and May 2021, Japan.

| Month    | Observed | Expected | 95% PI Upper Limit | 95% PI Lower Limit |
|----------|----------|----------|--------------------|--------------------|
| Jan 2017 | 1465     | 1684     | 2480               | 1391               |
| Feb 2017 | 1847     | 1813     | 2600               | 1525               |
| Mar 2017 | 2159     | 1872     | 2594               | 1605               |
| Apr 2017 | 1579     | 1821     | 2652               | 1520               |
| May 2017 | 1673     | 1608     | 2336               | 1336               |
| Jun 2017 | 1607     | 1695     | 2379               | 1439               |
| Jul 2017 | 1933     | 1646     | 2455               | 1349               |
| Aug 2017 | 1451     | 1566     | 2300               | 1290               |
| Sep 2017 | 1482     | 1471     | 2115               | 1222               |
| Oct 2017 | 1401     | 1696     | 2534               | 1390               |
| Nov 2017 | 2087     | 1821     | 2624               | 1528               |
| Dec 2017 | 1810     | 1754     | 2475               | 1484               |
| Jan 2018 | 1437     | 1647     | 2458               | 1348               |
| Feb 2018 | 1896     | 1798     | 2592               | 1509               |
| Mar 2018 | 1891     | 1828     | 2519               | 1572               |
| Apr 2018 | 1765     | 1769     | 2587               | 1471               |
| May 2018 | 1531     | 1558     | 2278               | 1289               |
| Jun 2018 | 1427     | 1674     | 2334               | 1427               |
| Jul 2018 | 1673     | 1624     | 2427               | 1330               |
| Aug 2018 | 1508     | 1552     | 2292               | 1275               |
| Sep 2018 | 1693     | 1437     | 2054               | 1198               |
| Oct 2018 | 1372     | 1654     | 2468               | 1357               |
| Nov 2018 | 1950     | 1766     | 2551               | 1479               |
| Dec 2018 | 1703     | 1716     | 2396               | 1461               |
| Jan 2019 | 1364     | 1626     | 2385               | 1345               |
| Feb 2019 | 1625     | 1743     | 2489               | 1470               |
| Mar 2019 | 1731     | 1777     | 2404               | 1542               |
| Apr 2019 | 1254     | 1737     | 2491               | 1461               |
| May 2019 | 3004     | 1535     | 2203               | 1283               |
| Jun 2019 | 1482     | 1628     | 2229               | 1401               |
| Jul 2019 | 1414     | 1583     | 2305               | 1315               |
| Aug 2019 | 1386     | 1539     | 2231               | 1280               |
| Sep 2019 | 1581     | 1406     | 1979               | 1183               |
| Oct 2019 | 1240     | 1587     | 2313               | 1318               |
| Nov 2019 | 2535     | 1640     | 2344               | 1377               |

| <b>Month</b> | <b>Observed</b> | <b>Expected</b> | <b>95% PI Upper Limit</b> | <b>95% PI Lower Limit</b> |
|--------------|-----------------|-----------------|---------------------------|---------------------------|
| Dec 2019     | 1622            | 1713            | 2611                      | 1393                      |
| Jan 2020     | 1215            | 1612            | 2500                      | 1294                      |
| Feb 2020     | 2557            | 1689            | 2653                      | 1351                      |
| Mar 2020     | 1402            | 1691            | 2574                      | 1376                      |
| Apr 2020     | 1264            | 1740            | 2667                      | 1414                      |
| May 2020     | 1050            | 1564            | 2479                      | 1239                      |
| Jun 2020     | 1480            | 1698            | 2621                      | 1373                      |
| Jul 2020     | 1209            | 1551            | 2502                      | 1215                      |
| Aug 2020     | 1384            | 1512            | 2491                      | 1168                      |
| Sep 2020     | 1104            | 1448            | 2378                      | 1117                      |
| Oct 2020     | 1314            | 1655            | 2751                      | 1280                      |
| Nov 2020     | 2286            | 1693            | 2824                      | 1309                      |
| Dec 2020     | 1441            | 1637            | 2720                      | 1264                      |
| Jan 2021     | 1253            | 1574            | 2697                      | 1191                      |
| Feb 2021     | 1600            | 1596            | 2731                      | 1212                      |
| Mar 2021     | 2013            | 1595            | 2665                      | 1227                      |
| Apr 2021     | 1118            | 1516            | 2642                      | 1134                      |
| May 2021     | 1465            | 1415            | 2483                      | 1048                      |

**eTable 2.** Observed and expected daily number of marriages, by month, with 95% prediction intervals between January 2017 and May 2021, Chubu.

| Month    | Observed | Expected | 95% PI Upper Limit | 95% PI Lower Limit |
|----------|----------|----------|--------------------|--------------------|
| Jan 2017 | 232      | 263      | 388                | 215                |
| Feb 2017 | 297      | 289      | 421                | 241                |
| Mar 2017 | 357      | 304      | 429                | 258                |
| Apr 2017 | 254      | 297      | 431                | 248                |
| May 2017 | 272      | 261      | 382                | 216                |
| Jun 2017 | 259      | 271      | 389                | 227                |
| Jul 2017 | 310      | 266      | 394                | 218                |
| Aug 2017 | 244      | 254      | 376                | 208                |
| Sep 2017 | 246      | 245      | 357                | 201                |
| Oct 2017 | 234      | 280      | 415                | 230                |
| Nov 2017 | 337      | 294      | 428                | 245                |
| Dec 2017 | 283      | 278      | 401                | 231                |
| Jan 2018 | 224      | 258      | 386                | 210                |
| Feb 2018 | 304      | 289      | 421                | 240                |
| Mar 2018 | 310      | 298      | 418                | 254                |
| Apr 2018 | 292      | 289      | 421                | 241                |
| May 2018 | 251      | 253      | 371                | 209                |
| Jun 2018 | 239      | 269      | 382                | 226                |
| Jul 2018 | 269      | 263      | 390                | 216                |
| Aug 2018 | 251      | 252      | 374                | 206                |
| Sep 2018 | 276      | 239      | 347                | 197                |
| Oct 2018 | 225      | 272      | 402                | 223                |
| Nov 2018 | 314      | 285      | 415                | 237                |
| Dec 2018 | 269      | 272      | 387                | 228                |
| Jan 2019 | 218      | 256      | 375                | 211                |
| Feb 2019 | 258      | 281      | 404                | 236                |
| Mar 2019 | 288      | 290      | 396                | 250                |
| Apr 2019 | 203      | 285      | 404                | 241                |
| May 2019 | 489      | 251      | 359                | 210                |
| Jun 2019 | 239      | 263      | 363                | 225                |
| Jul 2019 | 225      | 258      | 370                | 216                |
| Aug 2019 | 233      | 251      | 363                | 209                |
| Sep 2019 | 260      | 234      | 331                | 196                |
| Oct 2019 | 203      | 261      | 374                | 218                |
| Nov 2019 | 403      | 265      | 379                | 221                |

| <b>Month</b> | <b>Observed</b> | <b>Expected</b> | <b>95% PI Upper Limit</b> | <b>95% PI Lower Limit</b> |
|--------------|-----------------|-----------------|---------------------------|---------------------------|
| Dec 2019     | 257             | 272             | 420                       | 219                       |
| Jan 2020     | 189             | 255             | 393                       | 204                       |
| Feb 2020     | 410             | 273             | 430                       | 217                       |
| Mar 2020     | 229             | 276             | 423                       | 223                       |
| Apr 2020     | 213             | 286             | 433                       | 233                       |
| May 2020     | 176             | 256             | 403                       | 203                       |
| Jun 2020     | 248             | 274             | 426                       | 221                       |
| Jul 2020     | 192             | 253             | 401                       | 200                       |
| Aug 2020     | 233             | 247             | 404                       | 191                       |
| Sep 2020     | 179             | 240             | 394                       | 185                       |
| Oct 2020     | 215             | 270             | 443                       | 210                       |
| Nov 2020     | 364             | 272             | 452                       | 210                       |
| Dec 2020     | 226             | 260             | 433                       | 199                       |
| Jan 2021     | 195             | 249             | 425                       | 189                       |
| Feb 2021     | 255             | 257             | 438                       | 195                       |
| Mar 2021     | 333             | 260             | 433                       | 200                       |
| Apr 2021     | 181             | 249             | 428                       | 187                       |
| May 2021     | 240             | 232             | 403                       | 173                       |

**eTable 3.** Observed and expected daily number of marriages, by month, with 95% prediction intervals between January 2017 and May 2021, Chugoku.

| Month    | Observed | Expected | 95% PI Upper Limit | 95% PI Lower Limit |
|----------|----------|----------|--------------------|--------------------|
| Jan 2017 | 77       | 89       | 132                | 73                 |
| Feb 2017 | 99       | 99       | 145                | 82                 |
| Mar 2017 | 120      | 105      | 146                | 90                 |
| Apr 2017 | 87       | 102      | 148                | 85                 |
| May 2017 | 91       | 88       | 130                | 72                 |
| Jun 2017 | 85       | 89       | 127                | 75                 |
| Jul 2017 | 98       | 86       | 129                | 70                 |
| Aug 2017 | 77       | 83       | 125                | 67                 |
| Sep 2017 | 83       | 79       | 115                | 65                 |
| Oct 2017 | 77       | 92       | 137                | 74                 |
| Nov 2017 | 106      | 97       | 143                | 79                 |
| Dec 2017 | 98       | 92       | 131                | 77                 |
| Jan 2018 | 75       | 86       | 129                | 69                 |
| Feb 2018 | 104      | 96       | 143                | 79                 |
| Mar 2018 | 103      | 101      | 140                | 86                 |
| Apr 2018 | 98       | 97       | 142                | 80                 |
| May 2018 | 78       | 84       | 125                | 68                 |
| Jun 2018 | 74       | 88       | 123                | 73                 |
| Jul 2018 | 84       | 85       | 127                | 68                 |
| Aug 2018 | 80       | 82       | 123                | 66                 |
| Sep 2018 | 92       | 77       | 111                | 63                 |
| Oct 2018 | 76       | 88       | 132                | 72                 |
| Nov 2018 | 101      | 93       | 138                | 76                 |
| Dec 2018 | 90       | 89       | 126                | 75                 |
| Jan 2019 | 76       | 85       | 126                | 69                 |
| Feb 2019 | 88       | 93       | 135                | 76                 |
| Mar 2019 | 98       | 97       | 131                | 83                 |
| Apr 2019 | 70       | 94       | 136                | 78                 |
| May 2019 | 167      | 82       | 119                | 67                 |
| Jun 2019 | 75       | 84       | 117                | 71                 |
| Jul 2019 | 72       | 81       | 119                | 66                 |
| Aug 2019 | 72       | 80       | 118                | 65                 |
| Sep 2019 | 87       | 75       | 106                | 62                 |
| Oct 2019 | 69       | 84       | 123                | 69                 |
| Nov 2019 | 132      | 86       | 125                | 71                 |

| <b>Month</b> | <b>Observed</b> | <b>Expected</b> | <b>95% PI Upper Limit</b> | <b>95% PI Lower Limit</b> |
|--------------|-----------------|-----------------|---------------------------|---------------------------|
| Dec 2019     | 86              | 90              | 141                       | 71                        |
| Jan 2020     | 61              | 85              | 133                       | 67                        |
| Feb 2020     | 137             | 91              | 147                       | 72                        |
| Mar 2020     | 79              | 93              | 144                       | 74                        |
| Apr 2020     | 73              | 95              | 146                       | 77                        |
| May 2020     | 60              | 84              | 135                       | 65                        |
| Jun 2020     | 84              | 89              | 140                       | 70                        |
| Jul 2020     | 66              | 80              | 130                       | 62                        |
| Aug 2020     | 76              | 79              | 133                       | 60                        |
| Sep 2020     | 61              | 78              | 129                       | 59                        |
| Oct 2020     | 71              | 88              | 146                       | 68                        |
| Nov 2020     | 122             | 89              | 150                       | 68                        |
| Dec 2020     | 75              | 86              | 144                       | 65                        |
| Jan 2021     | 70              | 84              | 143                       | 63                        |
| Feb 2021     | 91              | 88              | 150                       | 66                        |
| Mar 2021     | 118             | 89              | 148                       | 68                        |
| Apr 2021     | 62              | 85              | 146                       | 64                        |
| May 2021     | 79              | 78              | 136                       | 58                        |

**eTable 4.** Observed and expected daily number of marriages, by month, with 95% prediction intervals between January 2017 and May 2021, Hokkaido.

| Month    | Observed | Expected | 95% PI Upper Limit | 95% PI Lower Limit |
|----------|----------|----------|--------------------|--------------------|
| Jan 2017 | 59       | 66       | 94                 | 54                 |
| Feb 2017 | 70       | 72       | 102                | 60                 |
| Mar 2017 | 89       | 75       | 103                | 64                 |
| Apr 2017 | 63       | 72       | 102                | 61                 |
| May 2017 | 63       | 66       | 94                 | 55                 |
| Jun 2017 | 72       | 69       | 95                 | 58                 |
| Jul 2017 | 73       | 70       | 99                 | 58                 |
| Aug 2017 | 62       | 65       | 94                 | 54                 |
| Sep 2017 | 58       | 61       | 85                 | 50                 |
| Oct 2017 | 55       | 66       | 95                 | 55                 |
| Nov 2017 | 76       | 70       | 100                | 58                 |
| Dec 2017 | 68       | 67       | 94                 | 56                 |
| Jan 2018 | 56       | 64       | 92                 | 52                 |
| Feb 2018 | 75       | 71       | 101                | 59                 |
| Mar 2018 | 76       | 72       | 99                 | 62                 |
| Apr 2018 | 67       | 70       | 99                 | 58                 |
| May 2018 | 58       | 64       | 91                 | 53                 |
| Jun 2018 | 59       | 67       | 92                 | 57                 |
| Jul 2018 | 63       | 68       | 96                 | 57                 |
| Aug 2018 | 61       | 63       | 92                 | 52                 |
| Sep 2018 | 68       | 59       | 83                 | 49                 |
| Oct 2018 | 54       | 64       | 92                 | 53                 |
| Nov 2018 | 75       | 66       | 95                 | 55                 |
| Dec 2018 | 66       | 64       | 89                 | 54                 |
| Jan 2019 | 52       | 61       | 88                 | 51                 |
| Feb 2019 | 62       | 67       | 95                 | 56                 |
| Mar 2019 | 71       | 68       | 93                 | 59                 |
| Apr 2019 | 51       | 67       | 93                 | 56                 |
| May 2019 | 112      | 60       | 86                 | 50                 |
| Jun 2019 | 67       | 63       | 87                 | 54                 |
| Jul 2019 | 56       | 64       | 90                 | 54                 |
| Aug 2019 | 58       | 61       | 87                 | 51                 |
| Sep 2019 | 63       | 56       | 79                 | 47                 |
| Oct 2019 | 47       | 61       | 86                 | 51                 |
| Nov 2019 | 95       | 62       | 88                 | 51                 |



| <b>Month</b> | <b>Observed</b> | <b>Expected</b> | <b>95% PI Upper Limit</b> | <b>95% PI Lower Limit</b> |
|--------------|-----------------|-----------------|---------------------------|---------------------------|
| Dec 2019     | 61              | 64              | 97                        | 52                        |
| Jan 2020     | 49              | 61              | 92                        | 49                        |
| Feb 2020     | 93              | 65              | 100                       | 52                        |
| Mar 2020     | 58              | 66              | 99                        | 54                        |
| Apr 2020     | 52              | 67              | 100                       | 55                        |
| May 2020     | 43              | 62              | 95                        | 49                        |
| Jun 2020     | 68              | 66              | 100                       | 54                        |
| Jul 2020     | 47              | 63              | 98                        | 50                        |
| Aug 2020     | 57              | 60              | 96                        | 47                        |
| Sep 2020     | 47              | 58              | 91                        | 45                        |
| Oct 2020     | 52              | 63              | 101                       | 49                        |
| Nov 2020     | 84              | 64              | 103                       | 49                        |
| Dec 2020     | 55              | 62              | 99                        | 48                        |
| Jan 2021     | 48              | 60              | 99                        | 46                        |
| Feb 2021     | 58              | 62              | 103                       | 48                        |
| Mar 2021     | 80              | 63              | 101                       | 49                        |
| Apr 2021     | 43              | 60              | 99                        | 45                        |
| May 2021     | 54              | 57              | 95                        | 44                        |

**eTable 5.** Observed and expected daily number of marriages, by month, with 95% prediction intervals between January 2017 and May 2021, Kansai.

| Month    | Observed | Expected | 95% PI Upper Limit | 95% PI Lower Limit |
|----------|----------|----------|--------------------|--------------------|
| Jan 2017 | 260      | 293      | 434                | 241                |
| Feb 2017 | 331      | 321      | 465                | 269                |
| Mar 2017 | 388      | 333      | 464                | 284                |
| Apr 2017 | 290      | 325      | 474                | 270                |
| May 2017 | 298      | 283      | 414                | 234                |
| Jun 2017 | 281      | 294      | 417                | 248                |
| Jul 2017 | 329      | 280      | 422                | 227                |
| Aug 2017 | 245      | 268      | 399                | 218                |
| Sep 2017 | 264      | 256      | 371                | 211                |
| Oct 2017 | 251      | 302      | 454                | 247                |
| Nov 2017 | 378      | 322      | 468                | 268                |
| Dec 2017 | 318      | 309      | 439                | 261                |
| Jan 2018 | 254      | 289      | 434                | 235                |
| Feb 2018 | 335      | 320      | 466                | 267                |
| Mar 2018 | 344      | 326      | 452                | 280                |
| Apr 2018 | 317      | 317      | 466                | 263                |
| May 2018 | 276      | 277      | 408                | 227                |
| Jun 2018 | 249      | 293      | 412                | 247                |
| Jul 2018 | 299      | 278      | 422                | 226                |
| Aug 2018 | 257      | 268      | 400                | 217                |
| Sep 2018 | 297      | 252      | 363                | 208                |
| Oct 2018 | 242      | 297      | 446                | 243                |
| Nov 2018 | 350      | 315      | 459                | 262                |
| Dec 2018 | 300      | 306      | 429                | 259                |
| Jan 2019 | 239      | 288      | 425                | 237                |
| Feb 2019 | 289      | 314      | 451                | 263                |
| Mar 2019 | 312      | 321      | 435                | 278                |
| Apr 2019 | 218      | 315      | 453                | 264                |
| May 2019 | 547      | 275      | 398                | 229                |
| Jun 2019 | 259      | 288      | 395                | 247                |
| Jul 2019 | 246      | 275      | 404                | 226                |
| Aug 2019 | 237      | 268      | 394                | 221                |
| Sep 2019 | 284      | 248      | 351                | 207                |
| Oct 2019 | 222      | 286      | 418                | 237                |
| Nov 2019 | 470      | 293      | 424                | 244                |

| <b>Month</b> | <b>Observed</b> | <b>Expected</b> | <b>95% PI Upper Limit</b> | <b>95% PI Lower Limit</b> |
|--------------|-----------------|-----------------|---------------------------|---------------------------|
| Dec 2019     | 287             | 306             | 474                       | 247                       |
| Jan 2020     | 210             | 286             | 448                       | 228                       |
| Feb 2020     | 459             | 303             | 483                       | 241                       |
| Mar 2020     | 252             | 304             | 470                       | 246                       |
| Apr 2020     | 230             | 315             | 486                       | 255                       |
| May 2020     | 190             | 281             | 451                       | 221                       |
| Jun 2020     | 267             | 302             | 475                       | 241                       |
| Jul 2020     | 218             | 270             | 444                       | 209                       |
| Aug 2020     | 241             | 264             | 446                       | 201                       |
| Sep 2020     | 199             | 256             | 430                       | 194                       |
| Oct 2020     | 240             | 299             | 504                       | 230                       |
| Nov 2020     | 424             | 305             | 517                       | 233                       |
| Dec 2020     | 257             | 294             | 497                       | 225                       |
| Jan 2021     | 227             | 281             | 489                       | 211                       |
| Feb 2021     | 284             | 288             | 500                       | 217                       |
| Mar 2021     | 373             | 290             | 491                       | 221                       |
| Apr 2021     | 203             | 277             | 488                       | 206                       |
| May 2021     | 264             | 257             | 457                       | 189                       |

**eTable 6.** Observed and expected daily number of marriages, by month, with 95% prediction intervals between January 2017 and May 2021, Kanto.

| Month    | Observed | Expected | 95% PI Upper Limit | 95% PI Lower Limit |
|----------|----------|----------|--------------------|--------------------|
| Jan 2017 | 537      | 627      | 930                | 516                |
| Feb 2017 | 681      | 657      | 943                | 553                |
| Mar 2017 | 760      | 666      | 929                | 569                |
| Apr 2017 | 560      | 649      | 958                | 536                |
| May 2017 | 618      | 580      | 848                | 480                |
| Jun 2017 | 585      | 629      | 884                | 534                |
| Jul 2017 | 731      | 612      | 921                | 499                |
| Aug 2017 | 531      | 578      | 850                | 476                |
| Sep 2017 | 535      | 534      | 773                | 442                |
| Oct 2017 | 509      | 616      | 933                | 501                |
| Nov 2017 | 788      | 672      | 966                | 564                |
| Dec 2017 | 669      | 653      | 923                | 553                |
| Jan 2018 | 537      | 616      | 927                | 503                |
| Feb 2018 | 699      | 658      | 946                | 554                |
| Mar 2018 | 681      | 657      | 909                | 564                |
| Apr 2018 | 627      | 635      | 939                | 524                |
| May 2018 | 574      | 567      | 831                | 467                |
| Jun 2018 | 529      | 625      | 871                | 533                |
| Jul 2018 | 625      | 606      | 913                | 494                |
| Aug 2018 | 562      | 576      | 852                | 474                |
| Sep 2018 | 615      | 525      | 752                | 437                |
| Oct 2018 | 502      | 607      | 915                | 496                |
| Nov 2018 | 734      | 655      | 943                | 549                |
| Dec 2018 | 631      | 643      | 896                | 548                |
| Jan 2019 | 510      | 610      | 899                | 504                |
| Feb 2019 | 608      | 641      | 914                | 541                |
| Mar 2019 | 616      | 643      | 876                | 556                |
| Apr 2019 | 463      | 629      | 911                | 526                |
| May 2019 | 1089     | 562      | 809                | 469                |
| Jun 2019 | 552      | 611      | 836                | 526                |
| Jul 2019 | 541      | 593      | 872                | 491                |
| Aug 2019 | 519      | 574      | 832                | 478                |
| Sep 2019 | 572      | 518      | 730                | 435                |
| Oct 2019 | 462      | 588      | 864                | 485                |
| Nov 2019 | 954      | 613      | 874                | 516                |

| <b>Month</b> | <b>Observed</b> | <b>Expected</b> | <b>95% PI Upper Limit</b> | <b>95% PI Lower Limit</b> |
|--------------|-----------------|-----------------|---------------------------|---------------------------|
| Dec 2019     | 605             | 644             | 969                       | 528                       |
| Jan 2020     | 469             | 607             | 942                       | 487                       |
| Feb 2020     | 963             | 624             | 973                       | 501                       |
| Mar 2020     | 505             | 617             | 932                       | 504                       |
| Apr 2020     | 428             | 634             | 978                       | 512                       |
| May 2020     | 372             | 576             | 911                       | 457                       |
| Jun 2020     | 512             | 638             | 975                       | 520                       |
| Jul 2020     | 446             | 584             | 947                       | 457                       |
| Aug 2020     | 504             | 567             | 929                       | 440                       |
| Sep 2020     | 404             | 538             | 880                       | 416                       |
| Oct 2020     | 482             | 619             | 1033                      | 478                       |
| Nov 2020     | 852             | 636             | 1061                      | 493                       |
| Dec 2020     | 542             | 618             | 1027                      | 478                       |
| Jan 2021     | 458             | 591             | 1020                      | 446                       |
| Feb 2021     | 593             | 589             | 1013                      | 446                       |
| Mar 2021     | 692             | 578             | 977                       | 441                       |
| Apr 2021     | 403             | 547             | 968                       | 403                       |
| May 2021     | 546             | 512             | 912                       | 375                       |

**eTable 7.** Observed and expected daily number of marriages, by month, with 95% prediction intervals between January 2017 and May 2021, Kyushu & Okinawa.

| Month    | Observed | Expected | 95% PI Upper Limit | 95% PI Lower Limit |
|----------|----------|----------|--------------------|--------------------|
| Jan 2017 | 177      | 200      | 296                | 164                |
| Feb 2017 | 212      | 218      | 315                | 183                |
| Mar 2017 | 260      | 226      | 313                | 193                |
| Apr 2017 | 186      | 217      | 319                | 180                |
| May 2017 | 190      | 186      | 274                | 153                |
| Jun 2017 | 177      | 194      | 273                | 163                |
| Jul 2017 | 227      | 190      | 286                | 154                |
| Aug 2017 | 171      | 183      | 272                | 150                |
| Sep 2017 | 167      | 171      | 246                | 142                |
| Oct 2017 | 158      | 196      | 295                | 159                |
| Nov 2017 | 235      | 212      | 308                | 177                |
| Dec 2017 | 219      | 206      | 290                | 174                |
| Jan 2018 | 170      | 194      | 291                | 158                |
| Feb 2018 | 217      | 213      | 309                | 178                |
| Mar 2018 | 220      | 217      | 301                | 186                |
| Apr 2018 | 209      | 209      | 309                | 172                |
| May 2018 | 172      | 178      | 264                | 145                |
| Jun 2018 | 155      | 190      | 267                | 160                |
| Jul 2018 | 195      | 186      | 282                | 150                |
| Aug 2018 | 175      | 180      | 269                | 147                |
| Sep 2018 | 200      | 166      | 238                | 137                |
| Oct 2018 | 158      | 189      | 286                | 153                |
| Nov 2018 | 220      | 205      | 299                | 170                |
| Dec 2018 | 201      | 200      | 281                | 170                |
| Jan 2019 | 159      | 190      | 283                | 156                |
| Feb 2019 | 190      | 205      | 296                | 171                |
| Mar 2019 | 206      | 209      | 286                | 180                |
| Apr 2019 | 145      | 203      | 296                | 169                |
| May 2019 | 350      | 174      | 255                | 144                |
| Jun 2019 | 164      | 183      | 255                | 156                |
| Jul 2019 | 162      | 180      | 266                | 147                |
| Aug 2019 | 158      | 178      | 260                | 146                |
| Sep 2019 | 181      | 161      | 229                | 134                |
| Oct 2019 | 138      | 180      | 266                | 148                |
| Nov 2019 | 283      | 188      | 272                | 156                |

| <b>Month</b> | <b>Observed</b> | <b>Expected</b> | <b>95% PI Upper Limit</b> | <b>95% PI Lower Limit</b> |
|--------------|-----------------|-----------------|---------------------------|---------------------------|
| Dec 2019     | 191             | 198             | 306                       | 159                       |
| Jan 2020     | 142             | 188             | 294                       | 149                       |
| Feb 2020     | 294             | 197             | 314                       | 156                       |
| Mar 2020     | 167             | 197             | 305                       | 159                       |
| Apr 2020     | 151             | 202             | 313                       | 163                       |
| May 2020     | 122             | 177             | 286                       | 138                       |
| Jun 2020     | 166             | 191             | 299                       | 152                       |
| Jul 2020     | 142             | 175             | 286                       | 136                       |
| Aug 2020     | 163             | 174             | 290                       | 133                       |
| Sep 2020     | 124             | 165             | 273                       | 125                       |
| Oct 2020     | 145             | 186             | 311                       | 142                       |
| Nov 2020     | 256             | 193             | 325                       | 148                       |
| Dec 2020     | 168             | 188             | 313                       | 144                       |
| Jan 2021     | 152             | 182             | 313                       | 137                       |
| Feb 2021     | 186             | 185             | 318                       | 140                       |
| Mar 2021     | 249             | 186             | 310                       | 143                       |
| Apr 2021     | 133             | 176             | 306                       | 131                       |
| May 2021     | 164             | 160             | 283                       | 117                       |

**eTable 8.** Observed and expected daily number of marriages, by month, with 95% prediction intervals between January 2017 and May 2021, Shikoku.

| Month    | Observed | Expected | 95% PI Upper Limit | 95% PI Lower Limit |
|----------|----------|----------|--------------------|--------------------|
| Jan 2017 | 39       | 47       | 69                 | 38                 |
| Feb 2017 | 51       | 51       | 73                 | 42                 |
| Mar 2017 | 57       | 52       | 73                 | 43                 |
| Apr 2017 | 43       | 50       | 73                 | 41                 |
| May 2017 | 43       | 43       | 63                 | 35                 |
| Jun 2017 | 44       | 44       | 62                 | 35                 |
| Jul 2017 | 49       | 42       | 63                 | 34                 |
| Aug 2017 | 37       | 40       | 59                 | 32                 |
| Sep 2017 | 39       | 37       | 55                 | 29                 |
| Oct 2017 | 35       | 43       | 64                 | 34                 |
| Nov 2017 | 51       | 47       | 68                 | 38                 |
| Dec 2017 | 46       | 46       | 65                 | 37                 |
| Jan 2018 | 37       | 45       | 67                 | 36                 |
| Feb 2018 | 55       | 49       | 70                 | 40                 |
| Mar 2018 | 50       | 50       | 70                 | 41                 |
| Apr 2018 | 48       | 47       | 69                 | 38                 |
| May 2018 | 39       | 41       | 61                 | 33                 |
| Jun 2018 | 35       | 43       | 61                 | 34                 |
| Jul 2018 | 41       | 41       | 62                 | 33                 |
| Aug 2018 | 39       | 39       | 58                 | 31                 |
| Sep 2018 | 45       | 36       | 53                 | 28                 |
| Oct 2018 | 34       | 41       | 63                 | 33                 |
| Nov 2018 | 47       | 45       | 66                 | 37                 |
| Dec 2018 | 45       | 44       | 62                 | 35                 |
| Jan 2019 | 35       | 43       | 64                 | 35                 |
| Feb 2019 | 41       | 46       | 67                 | 38                 |
| Mar 2019 | 47       | 48       | 67                 | 39                 |
| Apr 2019 | 31       | 46       | 66                 | 38                 |
| May 2019 | 79       | 40       | 58                 | 32                 |
| Jun 2019 | 37       | 41       | 59                 | 32                 |
| Jul 2019 | 33       | 40       | 58                 | 32                 |
| Aug 2019 | 34       | 38       | 56                 | 31                 |
| Sep 2019 | 41       | 35       | 51                 | 27                 |
| Oct 2019 | 29       | 39       | 57                 | 31                 |
| Nov 2019 | 63       | 40       | 59                 | 33                 |



| <b>Month</b> | <b>Observed</b> | <b>Expected</b> | <b>95% PI Upper Limit</b> | <b>95% PI Lower Limit</b> |
|--------------|-----------------|-----------------|---------------------------|---------------------------|
| Dec 2019     | 40              | 43              | 66                        | 34                        |
| Jan 2020     | 29              | 42              | 65                        | 32                        |
| Feb 2020     | 68              | 44              | 70                        | 34                        |
| Mar 2020     | 35              | 44              | 68                        | 35                        |
| Apr 2020     | 35              | 44              | 69                        | 35                        |
| May 2020     | 28              | 39              | 64                        | 30                        |
| Jun 2020     | 43              | 42              | 66                        | 33                        |
| Jul 2020     | 31              | 38              | 63                        | 28                        |
| Aug 2020     | 36              | 37              | 62                        | 27                        |
| Sep 2020     | 28              | 35              | 59                        | 26                        |
| Oct 2020     | 33              | 40              | 68                        | 29                        |
| Nov 2020     | 59              | 41              | 70                        | 30                        |
| Dec 2020     | 36              | 40              | 68                        | 30                        |
| Jan 2021     | 34              | 40              | 70                        | 29                        |
| Feb 2021     | 43              | 41              | 72                        | 30                        |
| Mar 2021     | 58              | 42              | 70                        | 32                        |
| Apr 2021     | 29              | 39              | 69                        | 29                        |
| May 2021     | 38              | 37              | 65                        | 27                        |

**eTable 9.** Observed and expected daily number of marriages, by month, with 95% prediction intervals between January 2017 and May 2021, Tohoku.

| Month    | Observed | Expected | 95% PI Upper Limit | 95% PI Lower Limit |
|----------|----------|----------|--------------------|--------------------|
| Jan 2017 | 85       | 100      | 144                | 83                 |
| Feb 2017 | 106      | 105      | 149                | 88                 |
| Mar 2017 | 128      | 110      | 151                | 94                 |
| Apr 2017 | 96       | 109      | 156                | 91                 |
| May 2017 | 98       | 100      | 144                | 83                 |
| Jun 2017 | 103      | 105      | 145                | 90                 |
| Jul 2017 | 116      | 101      | 148                | 83                 |
| Aug 2017 | 84       | 95       | 138                | 78                 |
| Sep 2017 | 91       | 88       | 125                | 73                 |
| Oct 2017 | 82       | 101      | 148                | 83                 |
| Nov 2017 | 116      | 109      | 156                | 91                 |
| Dec 2017 | 109      | 103      | 144                | 87                 |
| Jan 2018 | 83       | 96       | 141                | 78                 |
| Feb 2018 | 108      | 102      | 148                | 85                 |
| Mar 2018 | 106      | 106      | 144                | 91                 |
| Apr 2018 | 107      | 104      | 149                | 86                 |
| May 2018 | 84       | 95       | 138                | 78                 |
| Jun 2018 | 87       | 101      | 138                | 87                 |
| Jul 2018 | 96       | 97       | 142                | 80                 |
| Aug 2018 | 84       | 92       | 134                | 75                 |
| Sep 2018 | 100      | 84       | 118                | 70                 |
| Oct 2018 | 82       | 96       | 140                | 78                 |
| Nov 2018 | 110      | 103      | 148                | 85                 |
| Dec 2018 | 101      | 99       | 136                | 84                 |
| Jan 2019 | 75       | 92       | 134                | 76                 |
| Feb 2019 | 91       | 97       | 139                | 80                 |
| Mar 2019 | 93       | 100      | 134                | 86                 |
| Apr 2019 | 75       | 99       | 140                | 82                 |
| May 2019 | 170      | 90       | 130                | 75                 |
| Jun 2019 | 89       | 96       | 130                | 82                 |
| Jul 2019 | 80       | 92       | 132                | 76                 |
| Aug 2019 | 74       | 88       | 128                | 72                 |
| Sep 2019 | 92       | 80       | 112                | 67                 |
| Oct 2019 | 70       | 89       | 129                | 74                 |
| Nov 2019 | 137      | 93       | 133                | 77                 |

| <b>Month</b> | <b>Observed</b> | <b>Expected</b> | <b>95% PI Upper Limit</b> | <b>95% PI Lower Limit</b> |
|--------------|-----------------|-----------------|---------------------------|---------------------------|
| Dec 2019     | 95              | 96              | 144                       | 78                        |
| Jan 2020     | 67              | 89              | 138                       | 71                        |
| Feb 2020     | 133             | 92              | 144                       | 72                        |
| Mar 2020     | 77              | 93              | 140                       | 75                        |
| Apr 2020     | 81              | 96              | 147                       | 77                        |
| May 2020     | 60              | 89              | 140                       | 70                        |
| Jun 2020     | 93              | 96              | 146                       | 77                        |
| Jul 2020     | 67              | 87              | 139                       | 68                        |
| Aug 2020     | 75              | 84              | 137                       | 64                        |
| Sep 2020     | 63              | 79              | 128                       | 61                        |
| Oct 2020     | 74              | 90              | 148                       | 69                        |
| Nov 2020     | 124             | 93              | 153                       | 72                        |
| Dec 2020     | 81              | 90              | 145                       | 69                        |
| Jan 2021     | 69              | 86              | 144                       | 65                        |
| Feb 2021     | 90              | 85              | 144                       | 64                        |
| Mar 2021     | 111             | 87              | 142                       | 67                        |
| Apr 2021     | 64              | 84              | 142                       | 62                        |
| May 2021     | 81              | 81              | 138                       | 60                        |

**eTable 10.** Observed and expected daily number of divorces, by month, with 95% prediction intervals between January 2017 and May 2021, Japan.

| Month    | Observed | Expected | 95% PI Upper Limit | 95% PI Lower Limit |
|----------|----------|----------|--------------------|--------------------|
| Jan 2017 | 545      | 586      | 739                | 525                |
| Feb 2017 | 602      | 640      | 816                | 572                |
| Mar 2017 | 795      | 665      | 805                | 609                |
| Apr 2017 | 596      | 649      | 809                | 586                |
| May 2017 | 583      | 597      | 753                | 535                |
| Jun 2017 | 601      | 580      | 701                | 531                |
| Jul 2017 | 552      | 578      | 719                | 521                |
| Aug 2017 | 565      | 568      | 726                | 505                |
| Sep 2017 | 568      | 568      | 691                | 518                |
| Oct 2017 | 560      | 575      | 725                | 514                |
| Nov 2017 | 554      | 578      | 749                | 510                |
| Dec 2017 | 593      | 558      | 691                | 504                |
| Jan 2018 | 534      | 576      | 731                | 514                |
| Feb 2018 | 587      | 632      | 811                | 562                |
| Mar 2018 | 745      | 655      | 800                | 598                |
| Apr 2018 | 587      | 638      | 801                | 574                |
| May 2018 | 578      | 583      | 744                | 519                |
| Jun 2018 | 563      | 568      | 697                | 516                |
| Jul 2018 | 559      | 566      | 714                | 506                |
| Aug 2018 | 563      | 554      | 715                | 490                |
| Sep 2018 | 515      | 554      | 685                | 501                |
| Oct 2018 | 596      | 558      | 710                | 497                |
| Nov 2018 | 561      | 563      | 731                | 496                |
| Dec 2018 | 591      | 547      | 683                | 492                |
| Jan 2019 | 544      | 562      | 718                | 499                |
| Feb 2019 | 596      | 619      | 796                | 551                |
| Mar 2019 | 743      | 640      | 787                | 582                |
| Apr 2019 | 702      | 618      | 782                | 554                |
| May 2019 | 539      | 568      | 726                | 505                |
| Jun 2019 | 557      | 554      | 684                | 501                |
| Jul 2019 | 587      | 550      | 694                | 492                |
| Aug 2019 | 526      | 537      | 691                | 475                |
| Sep 2019 | 550      | 540      | 669                | 487                |
| Oct 2019 | 547      | 542      | 690                | 482                |
| Nov 2019 | 524      | 560      | 732                | 492                |

| <b>Month</b> | <b>Observed</b> | <b>Expected</b> | <b>95% PI Upper Limit</b> | <b>95% PI Lower Limit</b> |
|--------------|-----------------|-----------------|---------------------------|---------------------------|
| Dec 2019     | 588             | 541             | 676                       | 487                       |
| Jan 2020     | 543             | 554             | 708                       | 492                       |
| Feb 2020     | 573             | 614             | 795                       | 545                       |
| Mar 2020     | 759             | 637             | 782                       | 580                       |
| Apr 2020     | 550             | 620             | 784                       | 556                       |
| May 2020     | 370             | 569             | 725                       | 508                       |
| Jun 2020     | 506             | 550             | 672                       | 501                       |
| Jul 2020     | 523             | 547             | 682                       | 492                       |
| Aug 2020     | 492             | 537             | 688                       | 477                       |
| Sep 2020     | 521             | 537             | 659                       | 488                       |
| Oct 2020     | 525             | 544             | 685                       | 488                       |
| Nov 2020     | 504             | 554             | 718                       | 490                       |
| Dec 2020     | 581             | 529             | 680                       | 469                       |
| Jan 2021     | 476             | 538             | 714                       | 468                       |
| Feb 2021     | 539             | 594             | 785                       | 522                       |
| Mar 2021     | 727             | 607             | 768                       | 545                       |
| Apr 2021     | 557             | 583             | 765                       | 513                       |
| May 2021     | 452             | 526             | 691                       | 462                       |

**eTable 11.** Observed and expected daily number of divorces, by month, with 95% prediction intervals between January 2017 and May 2021, Chubu.

| Month    | Observed | Expected | 95% PI Upper Limit | 95% PI Lower Limit |
|----------|----------|----------|--------------------|--------------------|
| Jan 2017 | 83       | 90       | 117                | 78                 |
| Feb 2017 | 91       | 99       | 128                | 87                 |
| Mar 2017 | 123      | 102      | 130                | 89                 |
| Apr 2017 | 92       | 100      | 128                | 87                 |
| May 2017 | 90       | 91       | 118                | 79                 |
| Jun 2017 | 94       | 89       | 114                | 76                 |
| Jul 2017 | 87       | 88       | 114                | 76                 |
| Aug 2017 | 87       | 87       | 114                | 76                 |
| Sep 2017 | 87       | 87       | 112                | 75                 |
| Oct 2017 | 86       | 88       | 114                | 76                 |
| Nov 2017 | 84       | 89       | 116                | 77                 |
| Dec 2017 | 95       | 85       | 110                | 73                 |
| Jan 2018 | 84       | 88       | 115                | 77                 |
| Feb 2018 | 90       | 98       | 126                | 86                 |
| Mar 2018 | 117      | 101      | 128                | 88                 |
| Apr 2018 | 93       | 98       | 126                | 86                 |
| May 2018 | 89       | 89       | 116                | 78                 |
| Jun 2018 | 86       | 87       | 113                | 75                 |
| Jul 2018 | 85       | 87       | 113                | 75                 |
| Aug 2018 | 85       | 86       | 112                | 74                 |
| Sep 2018 | 81       | 85       | 110                | 73                 |
| Oct 2018 | 92       | 86       | 111                | 74                 |
| Nov 2018 | 87       | 87       | 114                | 76                 |
| Dec 2018 | 95       | 85       | 110                | 72                 |
| Jan 2019 | 84       | 87       | 113                | 75                 |
| Feb 2019 | 91       | 96       | 124                | 84                 |
| Mar 2019 | 117      | 99       | 126                | 86                 |
| Apr 2019 | 106      | 96       | 124                | 84                 |
| May 2019 | 80       | 88       | 114                | 76                 |
| Jun 2019 | 89       | 86       | 111                | 74                 |
| Jul 2019 | 88       | 85       | 111                | 73                 |
| Aug 2019 | 83       | 84       | 109                | 72                 |
| Sep 2019 | 87       | 84       | 109                | 71                 |
| Oct 2019 | 85       | 84       | 110                | 72                 |
| Nov 2019 | 80       | 87       | 114                | 76                 |

| <b>Month</b> | <b>Observed</b> | <b>Expected</b> | <b>95% PI Upper Limit</b> | <b>95% PI Lower Limit</b> |
|--------------|-----------------|-----------------|---------------------------|---------------------------|
| Dec 2019     | 92              | 84              | 109                       | 72                        |
| Jan 2020     | 85              | 86              | 112                       | 74                        |
| Feb 2020     | 90              | 95              | 123                       | 84                        |
| Mar 2020     | 118             | 98              | 126                       | 85                        |
| Apr 2020     | 84              | 96              | 124                       | 84                        |
| May 2020     | 61              | 88              | 114                       | 76                        |
| Jun 2020     | 82              | 85              | 110                       | 72                        |
| Jul 2020     | 84              | 85              | 110                       | 72                        |
| Aug 2020     | 80              | 83              | 109                       | 72                        |
| Sep 2020     | 83              | 84              | 108                       | 71                        |
| Oct 2020     | 85              | 85              | 110                       | 72                        |
| Nov 2020     | 77              | 86              | 113                       | 75                        |
| Dec 2020     | 89              | 83              | 109                       | 72                        |
| Jan 2021     | 74              | 85              | 112                       | 74                        |
| Feb 2021     | 86              | 93              | 122                       | 82                        |
| Mar 2021     | 118             | 95              | 123                       | 83                        |
| Apr 2021     | 89              | 92              | 120                       | 81                        |
| May 2021     | 71              | 83              | 109                       | 72                        |

**eTable 12.** Observed and expected daily number of divorces, by month, with 95% prediction intervals between January 2017 and May 2021, Chugoku.

| Month    | Observed | Expected | 95% PI Upper Limit | 95% PI Lower Limit |
|----------|----------|----------|--------------------|--------------------|
| Jan 2017 | 31       | 33       | 47                 | 24                 |
| Feb 2017 | 34       | 36       | 51                 | 27                 |
| Mar 2017 | 48       | 37       | 52                 | 28                 |
| Apr 2017 | 33       | 36       | 51                 | 27                 |
| May 2017 | 32       | 33       | 47                 | 24                 |
| Jun 2017 | 33       | 32       | 45                 | 23                 |
| Jul 2017 | 31       | 32       | 46                 | 23                 |
| Aug 2017 | 33       | 31       | 46                 | 23                 |
| Sep 2017 | 32       | 31       | 45                 | 22                 |
| Oct 2017 | 31       | 32       | 46                 | 23                 |
| Nov 2017 | 31       | 32       | 46                 | 23                 |
| Dec 2017 | 35       | 31       | 45                 | 22                 |
| Jan 2018 | 31       | 32       | 47                 | 24                 |
| Feb 2018 | 33       | 36       | 51                 | 27                 |
| Mar 2018 | 43       | 37       | 52                 | 28                 |
| Apr 2018 | 31       | 35       | 51                 | 27                 |
| May 2018 | 30       | 32       | 47                 | 24                 |
| Jun 2018 | 32       | 31       | 45                 | 22                 |
| Jul 2018 | 30       | 32       | 46                 | 23                 |
| Aug 2018 | 32       | 31       | 45                 | 23                 |
| Sep 2018 | 30       | 31       | 45                 | 23                 |
| Oct 2018 | 35       | 31       | 46                 | 23                 |
| Nov 2018 | 31       | 31       | 46                 | 23                 |
| Dec 2018 | 33       | 31       | 45                 | 22                 |
| Jan 2019 | 31       | 32       | 46                 | 23                 |
| Feb 2019 | 34       | 35       | 51                 | 27                 |
| Mar 2019 | 39       | 36       | 51                 | 27                 |
| Apr 2019 | 38       | 34       | 50                 | 26                 |
| May 2019 | 31       | 31       | 46                 | 23                 |
| Jun 2019 | 31       | 30       | 44                 | 22                 |
| Jul 2019 | 33       | 31       | 45                 | 23                 |
| Aug 2019 | 30       | 30       | 44                 | 22                 |
| Sep 2019 | 30       | 31       | 44                 | 22                 |
| Oct 2019 | 31       | 30       | 45                 | 22                 |
| Nov 2019 | 28       | 31       | 46                 | 23                 |



| <b>Month</b> | <b>Observed</b> | <b>Expected</b> | <b>95% PI Upper Limit</b> | <b>95% PI Lower Limit</b> |
|--------------|-----------------|-----------------|---------------------------|---------------------------|
| Dec 2019     | 34              | 30              | 44                        | 22                        |
| Jan 2020     | 29              | 31              | 46                        | 23                        |
| Feb 2020     | 31              | 35              | 50                        | 26                        |
| Mar 2020     | 43              | 36              | 51                        | 27                        |
| Apr 2020     | 32              | 34              | 49                        | 26                        |
| May 2020     | 22              | 31              | 45                        | 23                        |
| Jun 2020     | 31              | 30              | 44                        | 22                        |
| Jul 2020     | 29              | 30              | 45                        | 22                        |
| Aug 2020     | 29              | 30              | 44                        | 22                        |
| Sep 2020     | 27              | 30              | 44                        | 22                        |
| Oct 2020     | 28              | 30              | 45                        | 22                        |
| Nov 2020     | 29              | 31              | 46                        | 23                        |
| Dec 2020     | 32              | 30              | 44                        | 21                        |
| Jan 2021     | 28              | 30              | 45                        | 23                        |
| Feb 2021     | 30              | 34              | 49                        | 26                        |
| Mar 2021     | 41              | 35              | 50                        | 26                        |
| Apr 2021     | 32              | 33              | 48                        | 25                        |
| May 2021     | 24              | 29              | 44                        | 21                        |

**eTable 13.** Observed and expected daily number of divorces, by month, with 95% prediction intervals between January 2017 and May 2021, Hokkaido.

| Month    | Observed | Expected | 95% PI Upper Limit | 95% PI Lower Limit |
|----------|----------|----------|--------------------|--------------------|
| Jan 2017 | 27       | 28       | 41                 | 20                 |
| Feb 2017 | 29       | 32       | 46                 | 23                 |
| Mar 2017 | 38       | 33       | 47                 | 24                 |
| Apr 2017 | 29       | 33       | 47                 | 24                 |
| May 2017 | 27       | 30       | 44                 | 21                 |
| Jun 2017 | 28       | 28       | 41                 | 20                 |
| Jul 2017 | 27       | 28       | 41                 | 20                 |
| Aug 2017 | 28       | 28       | 41                 | 20                 |
| Sep 2017 | 27       | 27       | 40                 | 19                 |
| Oct 2017 | 27       | 28       | 41                 | 20                 |
| Nov 2017 | 26       | 27       | 41                 | 19                 |
| Dec 2017 | 25       | 26       | 39                 | 18                 |
| Jan 2018 | 26       | 27       | 40                 | 19                 |
| Feb 2018 | 28       | 30       | 45                 | 22                 |
| Mar 2018 | 36       | 32       | 46                 | 23                 |
| Apr 2018 | 29       | 31       | 45                 | 22                 |
| May 2018 | 27       | 28       | 41                 | 20                 |
| Jun 2018 | 26       | 27       | 40                 | 19                 |
| Jul 2018 | 27       | 27       | 40                 | 19                 |
| Aug 2018 | 27       | 26       | 40                 | 19                 |
| Sep 2018 | 22       | 26       | 39                 | 18                 |
| Oct 2018 | 29       | 26       | 39                 | 18                 |
| Nov 2018 | 28       | 26       | 39                 | 18                 |
| Dec 2018 | 26       | 25       | 37                 | 17                 |
| Jan 2019 | 25       | 26       | 39                 | 18                 |
| Feb 2019 | 28       | 29       | 43                 | 21                 |
| Mar 2019 | 37       | 30       | 44                 | 22                 |
| Apr 2019 | 34       | 29       | 43                 | 21                 |
| May 2019 | 25       | 26       | 39                 | 18                 |
| Jun 2019 | 25       | 26       | 38                 | 18                 |
| Jul 2019 | 29       | 26       | 38                 | 18                 |
| Aug 2019 | 24       | 25       | 38                 | 18                 |
| Sep 2019 | 25       | 25       | 37                 | 17                 |
| Oct 2019 | 27       | 25       | 38                 | 18                 |
| Nov 2019 | 26       | 25       | 39                 | 18                 |

| <b>Month</b> | <b>Observed</b> | <b>Expected</b> | <b>95% PI Upper Limit</b> | <b>95% PI Lower Limit</b> |
|--------------|-----------------|-----------------|---------------------------|---------------------------|
| Dec 2019     | 25              | 25              | 37                        | 17                        |
| Jan 2020     | 24              | 25              | 38                        | 18                        |
| Feb 2020     | 26              | 29              | 43                        | 21                        |
| Mar 2020     | 36              | 30              | 44                        | 22                        |
| Apr 2020     | 30              | 29              | 43                        | 21                        |
| May 2020     | 17              | 26              | 40                        | 19                        |
| Jun 2020     | 25              | 26              | 38                        | 18                        |
| Jul 2020     | 25              | 25              | 38                        | 18                        |
| Aug 2020     | 23              | 25              | 38                        | 18                        |
| Sep 2020     | 25              | 25              | 37                        | 17                        |
| Oct 2020     | 23              | 25              | 38                        | 18                        |
| Nov 2020     | 23              | 25              | 38                        | 18                        |
| Dec 2020     | 25              | 24              | 36                        | 16                        |
| Jan 2021     | 21              | 24              | 37                        | 17                        |
| Feb 2021     | 24              | 28              | 42                        | 21                        |
| Mar 2021     | 35              | 29              | 43                        | 21                        |
| Apr 2021     | 28              | 28              | 42                        | 20                        |
| May 2021     | 21              | 25              | 38                        | 18                        |

**eTable 14.** Observed and expected daily number of divorces, by month, with 95% prediction intervals between January 2017 and May 2021, Kansai.

| Month    | Observed | Expected | 95% PI Upper Limit | 95% PI Lower Limit |
|----------|----------|----------|--------------------|--------------------|
| Jan 2017 | 100      | 109      | 138                | 96                 |
| Feb 2017 | 113      | 119      | 150                | 106                |
| Mar 2017 | 147      | 123      | 153                | 108                |
| Apr 2017 | 105      | 120      | 151                | 107                |
| May 2017 | 110      | 111      | 140                | 98                 |
| Jun 2017 | 110      | 108      | 135                | 94                 |
| Jul 2017 | 100      | 107      | 136                | 94                 |
| Aug 2017 | 104      | 106      | 135                | 93                 |
| Sep 2017 | 106      | 106      | 133                | 92                 |
| Oct 2017 | 102      | 107      | 136                | 94                 |
| Nov 2017 | 101      | 106      | 136                | 93                 |
| Dec 2017 | 111      | 103      | 130                | 89                 |
| Jan 2018 | 101      | 106      | 135                | 94                 |
| Feb 2018 | 111      | 117      | 149                | 104                |
| Mar 2018 | 134      | 121      | 151                | 106                |
| Apr 2018 | 108      | 118      | 148                | 104                |
| May 2018 | 106      | 108      | 137                | 95                 |
| Jun 2018 | 102      | 105      | 133                | 91                 |
| Jul 2018 | 105      | 104      | 133                | 91                 |
| Aug 2018 | 103      | 102      | 131                | 90                 |
| Sep 2018 | 90       | 103      | 130                | 89                 |
| Oct 2018 | 107      | 103      | 131                | 90                 |
| Nov 2018 | 101      | 102      | 132                | 90                 |
| Dec 2018 | 106      | 100      | 127                | 86                 |
| Jan 2019 | 99       | 103      | 132                | 90                 |
| Feb 2019 | 108      | 114      | 145                | 101                |
| Mar 2019 | 137      | 117      | 146                | 103                |
| Apr 2019 | 129      | 113      | 143                | 100                |
| May 2019 | 96       | 104      | 133                | 91                 |
| Jun 2019 | 104      | 101      | 129                | 88                 |
| Jul 2019 | 106      | 100      | 128                | 88                 |
| Aug 2019 | 94       | 98       | 126                | 86                 |
| Sep 2019 | 102      | 98       | 125                | 85                 |
| Oct 2019 | 99       | 99       | 127                | 86                 |
| Nov 2019 | 97       | 101      | 132                | 88                 |

| <b>Month</b> | <b>Observed</b> | <b>Expected</b> | <b>95% PI Upper Limit</b> | <b>95% PI Lower Limit</b> |
|--------------|-----------------|-----------------|---------------------------|---------------------------|
| Dec 2019     | 107             | 98              | 125                       | 85                        |
| Jan 2020     | 99              | 100             | 129                       | 88                        |
| Feb 2020     | 105             | 111             | 144                       | 98                        |
| Mar 2020     | 140             | 115             | 144                       | 101                       |
| Apr 2020     | 101             | 112             | 142                       | 99                        |
| May 2020     | 68              | 103             | 132                       | 91                        |
| Jun 2020     | 90              | 100             | 127                       | 86                        |
| Jul 2020     | 95              | 99              | 126                       | 86                        |
| Aug 2020     | 88              | 97              | 125                       | 85                        |
| Sep 2020     | 98              | 97              | 124                       | 84                        |
| Oct 2020     | 96              | 99              | 126                       | 86                        |
| Nov 2020     | 92              | 100             | 130                       | 88                        |
| Dec 2020     | 104             | 96              | 124                       | 84                        |
| Jan 2021     | 88              | 98              | 130                       | 84                        |
| Feb 2021     | 102             | 108             | 143                       | 94                        |
| Mar 2021     | 134             | 110             | 140                       | 98                        |
| Apr 2021     | 102             | 106             | 139                       | 92                        |
| May 2021     | 83              | 95              | 125                       | 83                        |

**eTable 15.** Observed and expected daily number of divorces, by month, with 95% prediction intervals between January 2017 and May 2021, Kanto.

| Month    | Observed | Expected | 95% PI Upper Limit | 95% PI Lower Limit |
|----------|----------|----------|--------------------|--------------------|
| Jan 2017 | 185      | 199      | 251                | 178                |
| Feb 2017 | 205      | 214      | 271                | 191                |
| Mar 2017 | 264      | 221      | 269                | 202                |
| Apr 2017 | 204      | 216      | 269                | 194                |
| May 2017 | 195      | 201      | 252                | 180                |
| Jun 2017 | 206      | 196      | 237                | 178                |
| Jul 2017 | 189      | 196      | 243                | 176                |
| Aug 2017 | 188      | 191      | 242                | 170                |
| Sep 2017 | 189      | 191      | 233                | 174                |
| Oct 2017 | 188      | 194      | 244                | 174                |
| Nov 2017 | 189      | 199      | 255                | 176                |
| Dec 2017 | 203      | 192      | 237                | 173                |
| Jan 2018 | 178      | 199      | 251                | 178                |
| Feb 2018 | 197      | 214      | 272                | 191                |
| Mar 2018 | 245      | 221      | 269                | 202                |
| Apr 2018 | 198      | 215      | 269                | 194                |
| May 2018 | 198      | 198      | 251                | 177                |
| Jun 2018 | 192      | 194      | 238                | 175                |
| Jul 2018 | 189      | 193      | 242                | 173                |
| Aug 2018 | 192      | 187      | 240                | 166                |
| Sep 2018 | 175      | 187      | 232                | 169                |
| Oct 2018 | 199      | 189      | 239                | 168                |
| Nov 2018 | 188      | 194      | 249                | 172                |
| Dec 2018 | 202      | 188      | 235                | 169                |
| Jan 2019 | 183      | 193      | 245                | 172                |
| Feb 2019 | 201      | 209      | 267                | 187                |
| Mar 2019 | 246      | 216      | 266                | 196                |
| Apr 2019 | 237      | 209      | 262                | 187                |
| May 2019 | 187      | 193      | 245                | 172                |
| Jun 2019 | 185      | 188      | 232                | 170                |
| Jul 2019 | 200      | 187      | 235                | 167                |
| Aug 2019 | 179      | 181      | 231                | 160                |
| Sep 2019 | 183      | 182      | 225                | 164                |
| Oct 2019 | 186      | 183      | 231                | 163                |
| Nov 2019 | 179      | 192      | 248                | 169                |

| <b>Month</b> | <b>Observed</b> | <b>Expected</b> | <b>95% PI Upper Limit</b> | <b>95% PI Lower Limit</b> |
|--------------|-----------------|-----------------|---------------------------|---------------------------|
| Dec 2019     | 203             | 185             | 230                       | 167                       |
| Jan 2020     | 184             | 190             | 240                       | 169                       |
| Feb 2020     | 196             | 207             | 265                       | 184                       |
| Mar 2020     | 246             | 215             | 262                       | 196                       |
| Apr 2020     | 177             | 209             | 262                       | 188                       |
| May 2020     | 117             | 193             | 244                       | 173                       |
| Jun 2020     | 156             | 187             | 228                       | 170                       |
| Jul 2020     | 173             | 185             | 230                       | 167                       |
| Aug 2020     | 166             | 181             | 230                       | 161                       |
| Sep 2020     | 176             | 181             | 221                       | 164                       |
| Oct 2020     | 176             | 183             | 228                       | 164                       |
| Nov 2020     | 174             | 188             | 241                       | 167                       |
| Dec 2020     | 203             | 179             | 230                       | 157                       |
| Jan 2021     | 164             | 181             | 241                       | 157                       |
| Feb 2021     | 181             | 196             | 260                       | 171                       |
| Mar 2021     | 237             | 200             | 255                       | 178                       |
| Apr 2021     | 186             | 192             | 253                       | 168                       |
| May 2021     | 151             | 174             | 229                       | 152                       |

**eTable 16.** Observed and expected daily number of divorces, by month, with 95% prediction intervals between January 2017 and May 2021, Kyushu & Okinawa.

| Month    | Observed | Expected | 95% PI Upper Limit | 95% PI Lower Limit |
|----------|----------|----------|--------------------|--------------------|
| Jan 2017 | 70       | 73       | 96                 | 61                 |
| Feb 2017 | 74       | 80       | 105                | 69                 |
| Mar 2017 | 97       | 84       | 107                | 71                 |
| Apr 2017 | 74       | 81       | 106                | 69                 |
| May 2017 | 71       | 75       | 98                 | 63                 |
| Jun 2017 | 74       | 73       | 95                 | 60                 |
| Jul 2017 | 67       | 73       | 96                 | 61                 |
| Aug 2017 | 72       | 72       | 95                 | 61                 |
| Sep 2017 | 72       | 71       | 93                 | 59                 |
| Oct 2017 | 70       | 72       | 95                 | 60                 |
| Nov 2017 | 69       | 71       | 95                 | 60                 |
| Dec 2017 | 71       | 69       | 91                 | 57                 |
| Jan 2018 | 65       | 71       | 94                 | 60                 |
| Feb 2018 | 74       | 78       | 103                | 67                 |
| Mar 2018 | 97       | 81       | 105                | 69                 |
| Apr 2018 | 74       | 79       | 103                | 67                 |
| May 2018 | 75       | 72       | 96                 | 61                 |
| Jun 2018 | 72       | 71       | 93                 | 59                 |
| Jul 2018 | 71       | 71       | 93                 | 59                 |
| Aug 2018 | 72       | 70       | 92                 | 59                 |
| Sep 2018 | 65       | 69       | 91                 | 58                 |
| Oct 2018 | 76       | 70       | 93                 | 59                 |
| Nov 2018 | 72       | 70       | 93                 | 59                 |
| Dec 2018 | 73       | 68       | 90                 | 56                 |
| Jan 2019 | 71       | 70       | 92                 | 59                 |
| Feb 2019 | 77       | 78       | 103                | 67                 |
| Mar 2019 | 94       | 81       | 105                | 68                 |
| Apr 2019 | 92       | 78       | 102                | 66                 |
| May 2019 | 70       | 72       | 95                 | 61                 |
| Jun 2019 | 73       | 70       | 92                 | 58                 |
| Jul 2019 | 74       | 70       | 92                 | 58                 |
| Aug 2019 | 68       | 69       | 91                 | 58                 |
| Sep 2019 | 73       | 69       | 91                 | 57                 |
| Oct 2019 | 68       | 69       | 92                 | 58                 |
| Nov 2019 | 69       | 71       | 94                 | 60                 |



| <b>Month</b> | <b>Observed</b> | <b>Expected</b> | <b>95% PI Upper Limit</b> | <b>95% PI Lower Limit</b> |
|--------------|-----------------|-----------------|---------------------------|---------------------------|
| Dec 2019     | 71              | 68              | 90                        | 57                        |
| Jan 2020     | 71              | 70              | 93                        | 59                        |
| Feb 2020     | 73              | 79              | 104                       | 68                        |
| Mar 2020     | 99              | 82              | 106                       | 70                        |
| Apr 2020     | 71              | 80              | 105                       | 69                        |
| May 2020     | 50              | 74              | 97                        | 62                        |
| Jun 2020     | 70              | 71              | 93                        | 59                        |
| Jul 2020     | 67              | 71              | 94                        | 59                        |
| Aug 2020     | 61              | 70              | 93                        | 59                        |
| Sep 2020     | 63              | 70              | 92                        | 58                        |
| Oct 2020     | 69              | 71              | 94                        | 59                        |
| Nov 2020     | 63              | 71              | 95                        | 60                        |
| Dec 2020     | 72              | 68              | 91                        | 57                        |
| Jan 2021     | 59              | 70              | 93                        | 59                        |
| Feb 2021     | 70              | 78              | 103                       | 67                        |
| Mar 2021     | 93              | 80              | 104                       | 68                        |
| Apr 2021     | 69              | 76              | 101                       | 66                        |
| May 2021     | 59              | 69              | 93                        | 59                        |

**eTable 17.** Observed and expected daily number of divorces, by month, with 95% prediction intervals between January 2017 and May 2021, Shikoku.

| Month    | Observed | Expected | 95% PI Upper Limit | 95% PI Lower Limit |
|----------|----------|----------|--------------------|--------------------|
| Jan 2017 | 17       | 17       | 28                 | 11                 |
| Feb 2017 | 20       | 19       | 30                 | 13                 |
| Mar 2017 | 25       | 20       | 31                 | 13                 |
| Apr 2017 | 19       | 19       | 31                 | 13                 |
| May 2017 | 19       | 18       | 28                 | 11                 |
| Jun 2017 | 17       | 17       | 27                 | 10                 |
| Jul 2017 | 17       | 17       | 27                 | 10                 |
| Aug 2017 | 17       | 17       | 27                 | 10                 |
| Sep 2017 | 18       | 17       | 26                 | 10                 |
| Oct 2017 | 17       | 17       | 27                 | 10                 |
| Nov 2017 | 16       | 17       | 27                 | 11                 |
| Dec 2017 | 17       | 17       | 27                 | 10                 |
| Jan 2018 | 15       | 17       | 27                 | 11                 |
| Feb 2018 | 18       | 19       | 30                 | 12                 |
| Mar 2018 | 23       | 20       | 31                 | 13                 |
| Apr 2018 | 17       | 19       | 30                 | 12                 |
| May 2018 | 17       | 17       | 28                 | 11                 |
| Jun 2018 | 16       | 16       | 26                 | 10                 |
| Jul 2018 | 17       | 16       | 27                 | 10                 |
| Aug 2018 | 17       | 16       | 26                 | 10                 |
| Sep 2018 | 16       | 16       | 26                 | 10                 |
| Oct 2018 | 18       | 16       | 27                 | 10                 |
| Nov 2018 | 18       | 16       | 27                 | 10                 |
| Dec 2018 | 18       | 16       | 26                 | 10                 |
| Jan 2019 | 18       | 17       | 27                 | 10                 |
| Feb 2019 | 18       | 19       | 30                 | 12                 |
| Mar 2019 | 23       | 19       | 30                 | 12                 |
| Apr 2019 | 20       | 18       | 29                 | 12                 |
| May 2019 | 15       | 17       | 27                 | 10                 |
| Jun 2019 | 16       | 16       | 26                 | 10                 |
| Jul 2019 | 18       | 16       | 26                 | 10                 |
| Aug 2019 | 15       | 16       | 26                 | 10                 |
| Sep 2019 | 16       | 16       | 26                 | 10                 |
| Oct 2019 | 16       | 16       | 26                 | 10                 |
| Nov 2019 | 14       | 17       | 27                 | 10                 |

| <b>Month</b> | <b>Observed</b> | <b>Expected</b> | <b>95% PI Upper Limit</b> | <b>95% PI Lower Limit</b> |
|--------------|-----------------|-----------------|---------------------------|---------------------------|
| Dec 2019     | 17              | 16              | 26                        | 10                        |
| Jan 2020     | 17              | 17              | 27                        | 11                        |
| Feb 2020     | 16              | 19              | 30                        | 12                        |
| Mar 2020     | 22              | 20              | 31                        | 13                        |
| Apr 2020     | 17              | 19              | 30                        | 12                        |
| May 2020     | 12              | 17              | 27                        | 10                        |
| Jun 2020     | 17              | 16              | 26                        | 10                        |
| Jul 2020     | 15              | 16              | 26                        | 10                        |
| Aug 2020     | 15              | 16              | 26                        | 10                        |
| Sep 2020     | 15              | 16              | 26                        | 10                        |
| Oct 2020     | 15              | 16              | 26                        | 10                        |
| Nov 2020     | 14              | 16              | 26                        | 10                        |
| Dec 2020     | 18              | 16              | 26                        | 9                         |
| Jan 2021     | 15              | 16              | 27                        | 10                        |
| Feb 2021     | 15              | 18              | 29                        | 12                        |
| Mar 2021     | 21              | 18              | 29                        | 12                        |
| Apr 2021     | 16              | 18              | 28                        | 11                        |
| May 2021     | 13              | 16              | 26                        | 10                        |

**eTable 18.** Observed and expected daily number of divorces, by month, with 95% prediction intervals between January 2017 and May 2021, Tohoku.

| Month    | Observed | Expected | 95% PI Upper Limit | 95% PI Lower Limit |
|----------|----------|----------|--------------------|--------------------|
| Jan 2017 | 34       | 37       | 53                 | 28                 |
| Feb 2017 | 38       | 41       | 59                 | 32                 |
| Mar 2017 | 53       | 44       | 61                 | 34                 |
| Apr 2017 | 40       | 44       | 61                 | 34                 |
| May 2017 | 39       | 40       | 57                 | 31                 |
| Jun 2017 | 38       | 38       | 54                 | 29                 |
| Jul 2017 | 35       | 37       | 53                 | 28                 |
| Aug 2017 | 35       | 37       | 53                 | 29                 |
| Sep 2017 | 38       | 37       | 52                 | 28                 |
| Oct 2017 | 37       | 37       | 53                 | 29                 |
| Nov 2017 | 37       | 37       | 54                 | 29                 |
| Dec 2017 | 36       | 36       | 52                 | 27                 |
| Jan 2018 | 34       | 36       | 52                 | 27                 |
| Feb 2018 | 36       | 40       | 58                 | 32                 |
| Mar 2018 | 50       | 43       | 60                 | 33                 |
| Apr 2018 | 37       | 43       | 60                 | 33                 |
| May 2018 | 36       | 38       | 55                 | 30                 |
| Jun 2018 | 38       | 37       | 53                 | 28                 |
| Jul 2018 | 36       | 36       | 52                 | 27                 |
| Aug 2018 | 34       | 36       | 52                 | 28                 |
| Sep 2018 | 35       | 36       | 51                 | 27                 |
| Oct 2018 | 40       | 37       | 52                 | 28                 |
| Nov 2018 | 36       | 37       | 53                 | 28                 |
| Dec 2018 | 38       | 35       | 51                 | 26                 |
| Jan 2019 | 33       | 35       | 51                 | 26                 |
| Feb 2019 | 38       | 40       | 57                 | 31                 |
| Mar 2019 | 50       | 42       | 59                 | 32                 |
| Apr 2019 | 46       | 41       | 58                 | 32                 |
| May 2019 | 35       | 37       | 54                 | 29                 |
| Jun 2019 | 34       | 36       | 51                 | 27                 |
| Jul 2019 | 38       | 35       | 51                 | 26                 |
| Aug 2019 | 33       | 34       | 50                 | 26                 |
| Sep 2019 | 35       | 35       | 50                 | 26                 |
| Oct 2019 | 35       | 35       | 51                 | 27                 |
| Nov 2019 | 31       | 36       | 53                 | 28                 |

| <b>Month</b> | <b>Observed</b> | <b>Expected</b> | <b>95% PI Upper Limit</b> | <b>95% PI Lower Limit</b> |
|--------------|-----------------|-----------------|---------------------------|---------------------------|
| Dec 2019     | 39              | 34              | 50                        | 26                        |
| Jan 2020     | 34              | 34              | 50                        | 26                        |
| Feb 2020     | 37              | 39              | 56                        | 31                        |
| Mar 2020     | 54              | 41              | 58                        | 32                        |
| Apr 2020     | 38              | 41              | 58                        | 32                        |
| May 2020     | 25              | 37              | 53                        | 28                        |
| Jun 2020     | 35              | 35              | 50                        | 26                        |
| Jul 2020     | 33              | 34              | 50                        | 26                        |
| Aug 2020     | 30              | 34              | 50                        | 26                        |
| Sep 2020     | 33              | 34              | 49                        | 25                        |
| Oct 2020     | 33              | 36              | 51                        | 27                        |
| Nov 2020     | 33              | 36              | 52                        | 28                        |
| Dec 2020     | 38              | 34              | 49                        | 25                        |
| Jan 2021     | 27              | 34              | 50                        | 26                        |
| Feb 2021     | 32              | 39              | 56                        | 31                        |
| Mar 2021     | 47              | 40              | 57                        | 31                        |
| Apr 2021     | 34              | 39              | 56                        | 30                        |
| May 2021     | 29              | 34              | 51                        | 26                        |

**eTable 19.** Observed and expected daily number of total births, by month, with 95% prediction intervals between January 2017 and May 2021, Japan.

| Month    | Observed | Expected | 95% PI Upper Limit | 95% PI Lower Limit |
|----------|----------|----------|--------------------|--------------------|
| Jan 2017 | 2658     | 2707     | 2917               | 2617               |
| Feb 2017 | 2659     | 2669     | 2857               | 2589               |
| Mar 2017 | 2620     | 2649     | 2836               | 2570               |
| Apr 2017 | 2591     | 2659     | 2864               | 2571               |
| May 2017 | 2703     | 2685     | 2866               | 2607               |
| Jun 2017 | 2653     | 2741     | 2931               | 2660               |
| Jul 2017 | 2676     | 2780     | 2997               | 2688               |
| Aug 2017 | 2767     | 2845     | 3039               | 2764               |
| Sep 2017 | 2814     | 2840     | 3032               | 2759               |
| Oct 2017 | 2721     | 2799     | 3011               | 2710               |
| Nov 2017 | 2674     | 2718     | 2909               | 2637               |
| Dec 2017 | 2621     | 2679     | 2865               | 2600               |
| Jan 2018 | 2641     | 2633     | 2841               | 2544               |
| Feb 2018 | 2570     | 2597     | 2782               | 2517               |
| Mar 2018 | 2489     | 2577     | 2759               | 2499               |
| Apr 2018 | 2546     | 2581     | 2788               | 2492               |
| May 2018 | 2668     | 2599     | 2781               | 2521               |
| Jun 2018 | 2606     | 2646     | 2831               | 2567               |
| Jul 2018 | 2672     | 2678     | 2892               | 2587               |
| Aug 2018 | 2690     | 2739     | 2926               | 2660               |
| Sep 2018 | 2643     | 2734     | 2909               | 2660               |
| Oct 2018 | 2666     | 2690     | 2893               | 2603               |
| Nov 2018 | 2582     | 2615     | 2801               | 2536               |
| Dec 2018 | 2484     | 2589     | 2759               | 2516               |
| Jan 2019 | 2468     | 2545     | 2739               | 2461               |
| Feb 2019 | 2403     | 2516     | 2693               | 2439               |
| Mar 2019 | 2313     | 2493     | 2660               | 2421               |
| Apr 2019 | 2371     | 2492     | 2678               | 2411               |
| May 2019 | 2571     | 2512     | 2674               | 2441               |
| Jun 2019 | 2440     | 2545     | 2691               | 2481               |
| Jul 2019 | 2550     | 2556     | 2725               | 2483               |
| Aug 2019 | 2535     | 2594     | 2742               | 2530               |
| Sep 2019 | 2554     | 2582     | 2720               | 2519               |
| Oct 2019 | 2495     | 2529     | 2699               | 2456               |
| Nov 2019 | 2425     | 2461     | 2614               | 2394               |

| <b>Month</b> | <b>Observed</b> | <b>Expected</b> | <b>95% PI Upper Limit</b> | <b>95% PI Lower Limit</b> |
|--------------|-----------------|-----------------|---------------------------|---------------------------|
| Dec 2019     | 2410            | 2435            | 2569                      | 2375                      |
| Jan 2020     | 2409            | 2381            | 2538                      | 2313                      |
| Feb 2020     | 2298            | 2358            | 2504                      | 2295                      |
| Mar 2020     | 2295            | 2340            | 2470                      | 2279                      |
| Apr 2020     | 2443            | 2357            | 2513                      | 2288                      |
| May 2020     | 2321            | 2381            | 2526                      | 2317                      |
| Jun 2020     | 2435            | 2416            | 2549                      | 2355                      |
| Jul 2020     | 2477            | 2424            | 2584                      | 2354                      |
| Aug 2020     | 2443            | 2460            | 2608                      | 2395                      |
| Sep 2020     | 2528            | 2449            | 2580                      | 2385                      |
| Oct 2020     | 2414            | 2408            | 2569                      | 2337                      |
| Nov 2020     | 2316            | 2355            | 2501                      | 2291                      |
| Dec 2020     | 2235            | 2322            | 2452                      | 2262                      |
| Jan 2021     | 2056            | 2261            | 2416                      | 2193                      |
| Feb 2021     | 2135            | 2241            | 2385                      | 2178                      |
| Mar 2021     | 2240            | 2226            | 2353                      | 2167                      |
| Apr 2021     | 2353            | 2254            | 2414                      | 2184                      |
| May 2021     | 2272            | 2284            | 2432                      | 2219                      |

**eTable 20.** Observed and expected daily number of total births, by month, with 95% prediction intervals between January 2017 and May 2021, Chubu.

| Month    | Observed | Expected | 95% PI Upper Limit | 95% PI Lower Limit |
|----------|----------|----------|--------------------|--------------------|
| Jan 2017 | 456      | 457      | 511                | 427                |
| Feb 2017 | 453      | 454      | 508                | 423                |
| Mar 2017 | 458      | 449      | 503                | 419                |
| Apr 2017 | 440      | 449      | 503                | 419                |
| May 2017 | 467      | 451      | 504                | 420                |
| Jun 2017 | 450      | 464      | 518                | 433                |
| Jul 2017 | 454      | 473      | 528                | 442                |
| Aug 2017 | 478      | 485      | 540                | 453                |
| Sep 2017 | 480      | 484      | 539                | 452                |
| Oct 2017 | 464      | 477      | 532                | 446                |
| Nov 2017 | 454      | 462      | 516                | 431                |
| Dec 2017 | 443      | 457      | 510                | 425                |
| Jan 2018 | 461      | 449      | 503                | 419                |
| Feb 2018 | 444      | 447      | 499                | 415                |
| Mar 2018 | 430      | 442      | 494                | 410                |
| Apr 2018 | 431      | 440      | 493                | 410                |
| May 2018 | 457      | 440      | 492                | 409                |
| Jun 2018 | 446      | 450      | 503                | 419                |
| Jul 2018 | 455      | 458      | 512                | 427                |
| Aug 2018 | 460      | 469      | 523                | 437                |
| Sep 2018 | 451      | 469      | 522                | 436                |
| Oct 2018 | 457      | 460      | 514                | 429                |
| Nov 2018 | 445      | 446      | 498                | 414                |
| Dec 2018 | 427      | 443      | 494                | 411                |
| Jan 2019 | 427      | 436      | 488                | 405                |
| Feb 2019 | 413      | 435      | 486                | 403                |
| Mar 2019 | 395      | 428      | 478                | 397                |
| Apr 2019 | 398      | 426      | 478                | 396                |
| May 2019 | 430      | 428      | 478                | 396                |
| Jun 2019 | 417      | 435      | 485                | 402                |
| Jul 2019 | 436      | 438      | 490                | 407                |
| Aug 2019 | 431      | 445      | 496                | 412                |
| Sep 2019 | 432      | 443      | 493                | 409                |
| Oct 2019 | 427      | 432      | 483                | 401                |
| Nov 2019 | 410      | 420      | 469                | 388                |



| <b>Month</b> | <b>Observed</b> | <b>Expected</b> | <b>95% PI Upper Limit</b> | <b>95% PI Lower Limit</b> |
|--------------|-----------------|-----------------|---------------------------|---------------------------|
| Dec 2019     | 415             | 416             | 465                       | 384                       |
| Jan 2020     | 406             | 407             | 455                       | 376                       |
| Feb 2020     | 387             | 405             | 454                       | 374                       |
| Mar 2020     | 388             | 399             | 446                       | 367                       |
| Apr 2020     | 412             | 400             | 448                       | 369                       |
| May 2020     | 386             | 403             | 451                       | 371                       |
| Jun 2020     | 416             | 410             | 458                       | 378                       |
| Jul 2020     | 422             | 413             | 462                       | 382                       |
| Aug 2020     | 420             | 419             | 468                       | 387                       |
| Sep 2020     | 431             | 417             | 464                       | 383                       |
| Oct 2020     | 409             | 408             | 457                       | 377                       |
| Nov 2020     | 392             | 399             | 447                       | 368                       |
| Dec 2020     | 386             | 394             | 441                       | 363                       |
| Jan 2021     | 357             | 384             | 431                       | 353                       |
| Feb 2021     | 369             | 381             | 428                       | 351                       |
| Mar 2021     | 380             | 376             | 422                       | 345                       |
| Apr 2021     | 393             | 380             | 427                       | 350                       |
| May 2021     | 379             | 384             | 431                       | 354                       |

**eTable 21.** Observed and expected daily number of total births, by month, with 95% prediction intervals between January 2017 and May 2021, Chugoku.

| Month    | Observed | Expected | 95% PI Upper Limit | 95% PI Lower Limit |
|----------|----------|----------|--------------------|--------------------|
| Jan 2017 | 161      | 164      | 194                | 144                |
| Feb 2017 | 163      | 162      | 191                | 141                |
| Mar 2017 | 161      | 161      | 191                | 140                |
| Apr 2017 | 153      | 160      | 190                | 140                |
| May 2017 | 164      | 161      | 190                | 140                |
| Jun 2017 | 161      | 165      | 195                | 144                |
| Jul 2017 | 161      | 167      | 197                | 146                |
| Aug 2017 | 166      | 171      | 201                | 149                |
| Sep 2017 | 165      | 169      | 199                | 148                |
| Oct 2017 | 164      | 167      | 197                | 146                |
| Nov 2017 | 161      | 162      | 191                | 141                |
| Dec 2017 | 160      | 161      | 191                | 140                |
| Jan 2018 | 160      | 159      | 188                | 138                |
| Feb 2018 | 159      | 157      | 186                | 136                |
| Mar 2018 | 150      | 155      | 185                | 135                |
| Apr 2018 | 150      | 155      | 184                | 135                |
| May 2018 | 157      | 155      | 184                | 134                |
| Jun 2018 | 153      | 158      | 188                | 138                |
| Jul 2018 | 160      | 160      | 190                | 140                |
| Aug 2018 | 161      | 164      | 193                | 143                |
| Sep 2018 | 154      | 163      | 192                | 142                |
| Oct 2018 | 166      | 160      | 190                | 139                |
| Nov 2018 | 152      | 156      | 185                | 135                |
| Dec 2018 | 144      | 156      | 185                | 135                |
| Jan 2019 | 152      | 153      | 182                | 133                |
| Feb 2019 | 145      | 152      | 180                | 131                |
| Mar 2019 | 136      | 150      | 179                | 130                |
| Apr 2019 | 143      | 148      | 177                | 128                |
| May 2019 | 152      | 149      | 177                | 129                |
| Jun 2019 | 145      | 151      | 179                | 131                |
| Jul 2019 | 154      | 152      | 180                | 132                |
| Aug 2019 | 153      | 154      | 182                | 133                |
| Sep 2019 | 153      | 153      | 181                | 132                |
| Oct 2019 | 149      | 149      | 177                | 129                |
| Nov 2019 | 144      | 146      | 173                | 126                |

| <b>Month</b> | <b>Observed</b> | <b>Expected</b> | <b>95% PI Upper Limit</b> | <b>95% PI Lower Limit</b> |
|--------------|-----------------|-----------------|---------------------------|---------------------------|
| Dec 2019     | 145             | 145             | 172                       | 124                       |
| Jan 2020     | 142             | 142             | 169                       | 122                       |
| Feb 2020     | 141             | 141             | 169                       | 121                       |
| Mar 2020     | 137             | 140             | 167                       | 120                       |
| Apr 2020     | 146             | 140             | 167                       | 120                       |
| May 2020     | 134             | 141             | 168                       | 121                       |
| Jun 2020     | 146             | 143             | 170                       | 123                       |
| Jul 2020     | 150             | 144             | 172                       | 124                       |
| Aug 2020     | 146             | 146             | 173                       | 126                       |
| Sep 2020     | 150             | 145             | 173                       | 125                       |
| Oct 2020     | 146             | 143             | 170                       | 123                       |
| Nov 2020     | 136             | 140             | 167                       | 120                       |
| Dec 2020     | 135             | 138             | 164                       | 118                       |
| Jan 2021     | 128             | 135             | 162                       | 116                       |
| Feb 2021     | 130             | 135             | 161                       | 115                       |
| Mar 2021     | 133             | 133             | 160                       | 114                       |
| Apr 2021     | 140             | 133             | 160                       | 114                       |
| May 2021     | 135             | 135             | 162                       | 116                       |

**eTable 22.** Observed and expected daily number of total births, by month, with 95% prediction intervals between January 2017 and May 2021, Hokkaido.

| Month    | Observed | Expected | 95% PI Upper Limit | 95% PI Lower Limit |
|----------|----------|----------|--------------------|--------------------|
| Jan 2017 | 95       | 98       | 121                | 81                 |
| Feb 2017 | 94       | 97       | 119                | 80                 |
| Mar 2017 | 94       | 97       | 120                | 81                 |
| Apr 2017 | 98       | 98       | 121                | 82                 |
| May 2017 | 97       | 98       | 121                | 82                 |
| Jun 2017 | 98       | 99       | 122                | 83                 |
| Jul 2017 | 101      | 100      | 123                | 83                 |
| Aug 2017 | 101      | 103      | 126                | 86                 |
| Sep 2017 | 101      | 102      | 126                | 85                 |
| Oct 2017 | 99       | 101      | 124                | 84                 |
| Nov 2017 | 98       | 98       | 120                | 81                 |
| Dec 2017 | 92       | 96       | 118                | 80                 |
| Jan 2018 | 93       | 93       | 115                | 77                 |
| Feb 2018 | 94       | 92       | 114                | 76                 |
| Mar 2018 | 90       | 93       | 115                | 77                 |
| Apr 2018 | 90       | 93       | 115                | 77                 |
| May 2018 | 97       | 94       | 116                | 77                 |
| Jun 2018 | 94       | 95       | 117                | 78                 |
| Jul 2018 | 96       | 96       | 118                | 79                 |
| Aug 2018 | 98       | 98       | 120                | 81                 |
| Sep 2018 | 94       | 98       | 121                | 81                 |
| Oct 2018 | 95       | 97       | 119                | 80                 |
| Nov 2018 | 91       | 93       | 115                | 77                 |
| Dec 2018 | 89       | 92       | 114                | 76                 |
| Jan 2019 | 87       | 90       | 111                | 74                 |
| Feb 2019 | 85       | 89       | 110                | 73                 |
| Mar 2019 | 83       | 89       | 111                | 73                 |
| Apr 2019 | 87       | 89       | 111                | 73                 |
| May 2019 | 93       | 90       | 111                | 74                 |
| Jun 2019 | 86       | 91       | 112                | 74                 |
| Jul 2019 | 94       | 91       | 113                | 75                 |
| Aug 2019 | 91       | 93       | 114                | 76                 |
| Sep 2019 | 91       | 92       | 114                | 76                 |
| Oct 2019 | 89       | 90       | 112                | 74                 |
| Nov 2019 | 87       | 87       | 108                | 71                 |

| <b>Month</b> | <b>Observed</b> | <b>Expected</b> | <b>95% PI Upper Limit</b> | <b>95% PI Lower Limit</b> |
|--------------|-----------------|-----------------|---------------------------|---------------------------|
| Dec 2019     | 85              | 86              | 107                       | 70                        |
| Jan 2020     | 84              | 83              | 104                       | 68                        |
| Feb 2020     | 83              | 83              | 104                       | 68                        |
| Mar 2020     | 81              | 84              | 104                       | 68                        |
| Apr 2020     | 89              | 84              | 105                       | 69                        |
| May 2020     | 80              | 85              | 106                       | 69                        |
| Jun 2020     | 86              | 86              | 107                       | 70                        |
| Jul 2020     | 86              | 86              | 107                       | 70                        |
| Aug 2020     | 85              | 88              | 109                       | 72                        |
| Sep 2020     | 86              | 87              | 108                       | 71                        |
| Oct 2020     | 84              | 85              | 106                       | 70                        |
| Nov 2020     | 77              | 83              | 103                       | 67                        |
| Dec 2020     | 80              | 81              | 102                       | 66                        |
| Jan 2021     | 76              | 79              | 99                        | 64                        |
| Feb 2021     | 74              | 79              | 99                        | 64                        |
| Mar 2021     | 82              | 79              | 99                        | 64                        |
| Apr 2021     | 87              | 80              | 100                       | 65                        |
| May 2021     | 82              | 81              | 101                       | 65                        |

**eTable 23.** Observed and expected daily number of total births, by month, with 95% prediction intervals between January 2017 and May 2021, Kansai.

| Month    | Observed | Expected | 95% PI Upper Limit | 95% PI Lower Limit |
|----------|----------|----------|--------------------|--------------------|
| Jan 2017 | 475      | 475      | 530                | 443                |
| Feb 2017 | 465      | 469      | 523                | 437                |
| Mar 2017 | 464      | 468      | 522                | 436                |
| Apr 2017 | 456      | 467      | 521                | 435                |
| May 2017 | 474      | 471      | 524                | 438                |
| Jun 2017 | 465      | 481      | 536                | 449                |
| Jul 2017 | 472      | 489      | 545                | 457                |
| Aug 2017 | 485      | 501      | 555                | 467                |
| Sep 2017 | 485      | 499      | 554                | 466                |
| Oct 2017 | 475      | 492      | 548                | 460                |
| Nov 2017 | 472      | 479      | 533                | 446                |
| Dec 2017 | 463      | 472      | 525                | 439                |
| Jan 2018 | 459      | 463      | 516                | 431                |
| Feb 2018 | 456      | 457      | 510                | 425                |
| Mar 2018 | 445      | 455      | 508                | 423                |
| Apr 2018 | 448      | 454      | 507                | 423                |
| May 2018 | 473      | 456      | 508                | 424                |
| Jun 2018 | 458      | 465      | 518                | 433                |
| Jul 2018 | 487      | 471      | 525                | 439                |
| Aug 2018 | 474      | 480      | 533                | 447                |
| Sep 2018 | 465      | 479      | 532                | 446                |
| Oct 2018 | 464      | 472      | 526                | 440                |
| Nov 2018 | 457      | 460      | 512                | 428                |
| Dec 2018 | 436      | 455      | 507                | 422                |
| Jan 2019 | 443      | 446      | 498                | 415                |
| Feb 2019 | 422      | 444      | 495                | 411                |
| Mar 2019 | 413      | 441      | 492                | 409                |
| Apr 2019 | 419      | 440      | 492                | 409                |
| May 2019 | 458      | 442      | 492                | 409                |
| Jun 2019 | 438      | 449      | 500                | 416                |
| Jul 2019 | 448      | 451      | 502                | 418                |
| Aug 2019 | 454      | 457      | 507                | 422                |
| Sep 2019 | 450      | 453      | 502                | 418                |
| Oct 2019 | 443      | 444      | 494                | 411                |
| Nov 2019 | 433      | 433      | 482                | 400                |

| <b>Month</b> | <b>Observed</b> | <b>Expected</b> | <b>95% PI Upper Limit</b> | <b>95% PI Lower Limit</b> |
|--------------|-----------------|-----------------|---------------------------|---------------------------|
| Dec 2019     | 436             | 430             | 478                       | 396                       |
| Jan 2020     | 436             | 420             | 469                       | 388                       |
| Feb 2020     | 413             | 418             | 465                       | 385                       |
| Mar 2020     | 409             | 415             | 462                       | 382                       |
| Apr 2020     | 435             | 418             | 467                       | 386                       |
| May 2020     | 418             | 422             | 471                       | 389                       |
| Jun 2020     | 433             | 430             | 478                       | 396                       |
| Jul 2020     | 443             | 432             | 481                       | 399                       |
| Aug 2020     | 434             | 437             | 486                       | 403                       |
| Sep 2020     | 449             | 434             | 481                       | 399                       |
| Oct 2020     | 432             | 427             | 476                       | 394                       |
| Nov 2020     | 415             | 420             | 468                       | 387                       |
| Dec 2020     | 397             | 416             | 463                       | 383                       |
| Jan 2021     | 370             | 404             | 452                       | 372                       |
| Feb 2021     | 387             | 402             | 449                       | 369                       |
| Mar 2021     | 400             | 398             | 444                       | 365                       |
| Apr 2021     | 425             | 404             | 452                       | 372                       |
| May 2021     | 400             | 409             | 457                       | 377                       |

**eTable 24.** Observed and expected daily number of total births, by month, with 95% prediction intervals between January 2017 and May 2021, Kanto.

| Month    | Observed | Expected | 95% PI Upper Limit | 95% PI Lower Limit |
|----------|----------|----------|--------------------|--------------------|
| Jan 2017 | 879      | 904      | 985                | 865                |
| Feb 2017 | 876      | 886      | 965                | 847                |
| Mar 2017 | 858      | 877      | 954                | 837                |
| Apr 2017 | 859      | 885      | 964                | 846                |
| May 2017 | 900      | 898      | 977                | 858                |
| Jun 2017 | 880      | 918      | 996                | 877                |
| Jul 2017 | 893      | 928      | 1010               | 890                |
| Aug 2017 | 912      | 949      | 1031               | 909                |
| Sep 2017 | 946      | 951      | 1031               | 909                |
| Oct 2017 | 908      | 941      | 1023               | 902                |
| Nov 2017 | 885      | 917      | 997                | 877                |
| Dec 2017 | 868      | 900      | 978                | 859                |
| Jan 2018 | 872      | 883      | 962                | 845                |
| Feb 2018 | 839      | 866      | 944                | 827                |
| Mar 2018 | 820      | 858      | 933                | 817                |
| Apr 2018 | 848      | 864      | 943                | 826                |
| May 2018 | 899      | 875      | 952                | 835                |
| Jun 2018 | 872      | 890      | 967                | 849                |
| Jul 2018 | 886      | 897      | 977                | 858                |
| Aug 2018 | 901      | 916      | 996                | 876                |
| Sep 2018 | 887      | 916      | 993                | 873                |
| Oct 2018 | 899      | 903      | 983                | 864                |
| Nov 2018 | 860      | 879      | 957                | 840                |
| Dec 2018 | 837      | 866      | 941                | 825                |
| Jan 2019 | 814      | 850      | 928                | 812                |
| Feb 2019 | 800      | 835      | 911                | 797                |
| Mar 2019 | 765      | 828      | 900                | 787                |
| Apr 2019 | 785      | 832      | 908                | 794                |
| May 2019 | 882      | 843      | 917                | 802                |
| Jun 2019 | 819      | 854      | 925                | 809                |
| Jul 2019 | 860      | 855      | 930                | 814                |
| Aug 2019 | 846      | 868      | 941                | 825                |
| Sep 2019 | 867      | 867      | 938                | 821                |
| Oct 2019 | 847      | 851      | 926                | 811                |
| Nov 2019 | 820      | 829      | 902                | 788                |



| <b>Month</b> | <b>Observed</b> | <b>Expected</b> | <b>95% PI Upper Limit</b> | <b>95% PI Lower Limit</b> |
|--------------|-----------------|-----------------|---------------------------|---------------------------|
| Dec 2019     | 806             | 817             | 886                       | 773                       |
| Jan 2020     | 807             | 799             | 872                       | 760                       |
| Feb 2020     | 767             | 787             | 859                       | 748                       |
| Mar 2020     | 778             | 781             | 849                       | 739                       |
| Apr 2020     | 822             | 793             | 866                       | 754                       |
| May 2020     | 797             | 804             | 877                       | 764                       |
| Jun 2020     | 822             | 818             | 887                       | 774                       |
| Jul 2020     | 833             | 816             | 890                       | 777                       |
| Aug 2020     | 826             | 829             | 903                       | 789                       |
| Sep 2020     | 851             | 828             | 898                       | 784                       |
| Oct 2020     | 816             | 817             | 891                       | 778                       |
| Nov 2020     | 786             | 798             | 871                       | 759                       |
| Dec 2020     | 745             | 783             | 851                       | 741                       |
| Jan 2021     | 658             | 762             | 833                       | 724                       |
| Feb 2021     | 698             | 752             | 822                       | 714                       |
| Mar 2021     | 749             | 748             | 814                       | 706                       |
| Apr 2021     | 782             | 764             | 835                       | 726                       |
| May 2021     | 775             | 776             | 847                       | 737                       |

**eTable 25.** Observed and expected daily number of total births, by month, with 95% prediction intervals between January 2017 and May 2021, Kyushu & Okinawa.

| Month    | Observed | Expected | 95% PI Upper Limit | 95% PI Lower Limit |
|----------|----------|----------|--------------------|--------------------|
| Jan 2017 | 346      | 358      | 404                | 329                |
| Feb 2017 | 358      | 352      | 396                | 322                |
| Mar 2017 | 341      | 349      | 393                | 319                |
| Apr 2017 | 343      | 348      | 394                | 320                |
| May 2017 | 347      | 351      | 395                | 320                |
| Jun 2017 | 351      | 356      | 402                | 327                |
| Jul 2017 | 348      | 363      | 410                | 335                |
| Aug 2017 | 364      | 373      | 419                | 342                |
| Sep 2017 | 373      | 371      | 418                | 342                |
| Oct 2017 | 359      | 363      | 410                | 334                |
| Nov 2017 | 358      | 353      | 398                | 323                |
| Dec 2017 | 356      | 350      | 395                | 321                |
| Jan 2018 | 353      | 347      | 392                | 318                |
| Feb 2018 | 342      | 340      | 384                | 311                |
| Mar 2018 | 330      | 337      | 381                | 308                |
| Apr 2018 | 340      | 335      | 380                | 307                |
| May 2018 | 340      | 338      | 381                | 309                |
| Jun 2018 | 341      | 343      | 388                | 315                |
| Jul 2018 | 343      | 351      | 397                | 322                |
| Aug 2018 | 348      | 361      | 406                | 331                |
| Sep 2018 | 351      | 360      | 405                | 330                |
| Oct 2018 | 347      | 353      | 398                | 324                |
| Nov 2018 | 343      | 345      | 389                | 316                |
| Dec 2018 | 329      | 344      | 388                | 314                |
| Jan 2019 | 329      | 339      | 384                | 311                |
| Feb 2019 | 319      | 333      | 376                | 304                |
| Mar 2019 | 307      | 330      | 373                | 301                |
| Apr 2019 | 321      | 327      | 371                | 299                |
| May 2019 | 325      | 329      | 372                | 300                |
| Jun 2019 | 317      | 332      | 375                | 303                |
| Jul 2019 | 328      | 336      | 380                | 307                |
| Aug 2019 | 333      | 343      | 386                | 312                |
| Sep 2019 | 334      | 341      | 384                | 311                |
| Oct 2019 | 321      | 334      | 378                | 306                |
| Nov 2019 | 323      | 327      | 369                | 298                |

| <b>Month</b> | <b>Observed</b> | <b>Expected</b> | <b>95% PI Upper Limit</b> | <b>95% PI Lower Limit</b> |
|--------------|-----------------|-----------------|---------------------------|---------------------------|
| Dec 2019     | 314             | 325             | 367                       | 296                       |
| Jan 2020     | 321             | 319             | 361                       | 290                       |
| Feb 2020     | 305             | 313             | 354                       | 284                       |
| Mar 2020     | 298             | 311             | 352                       | 282                       |
| Apr 2020     | 319             | 310             | 352                       | 282                       |
| May 2020     | 300             | 312             | 353                       | 283                       |
| Jun 2020     | 313             | 314             | 355                       | 285                       |
| Jul 2020     | 323             | 317             | 359                       | 288                       |
| Aug 2020     | 320             | 323             | 365                       | 294                       |
| Sep 2020     | 336             | 322             | 363                       | 292                       |
| Oct 2020     | 319             | 316             | 358                       | 288                       |
| Nov 2020     | 309             | 310             | 351                       | 282                       |
| Dec 2020     | 297             | 308             | 348                       | 279                       |
| Jan 2021     | 282             | 301             | 342                       | 273                       |
| Feb 2021     | 288             | 297             | 337                       | 269                       |
| Mar 2021     | 295             | 296             | 336                       | 268                       |
| Apr 2021     | 314             | 296             | 336                       | 268                       |
| May 2021     | 299             | 299             | 339                       | 271                       |

**eTable 26.** Observed and expected daily number of total births, by month, with 95% prediction intervals between January 2017 and May 2021, Shikoku.

| Month    | Observed | Expected | 95% PI Upper Limit | 95% PI Lower Limit |
|----------|----------|----------|--------------------|--------------------|
| Jan 2017 | 77       | 79       | 99                 | 64                 |
| Feb 2017 | 81       | 78       | 98                 | 63                 |
| Mar 2017 | 78       | 77       | 97                 | 62                 |
| Apr 2017 | 77       | 77       | 97                 | 62                 |
| May 2017 | 77       | 78       | 98                 | 63                 |
| Jun 2017 | 78       | 80       | 100                | 65                 |
| Jul 2017 | 75       | 81       | 101                | 65                 |
| Aug 2017 | 82       | 82       | 102                | 66                 |
| Sep 2017 | 82       | 82       | 102                | 66                 |
| Oct 2017 | 79       | 81       | 101                | 65                 |
| Nov 2017 | 79       | 78       | 98                 | 63                 |
| Dec 2017 | 77       | 77       | 97                 | 62                 |
| Jan 2018 | 80       | 76       | 96                 | 62                 |
| Feb 2018 | 76       | 76       | 95                 | 61                 |
| Mar 2018 | 72       | 75       | 94                 | 60                 |
| Apr 2018 | 76       | 75       | 94                 | 60                 |
| May 2018 | 74       | 75       | 95                 | 60                 |
| Jun 2018 | 75       | 77       | 96                 | 62                 |
| Jul 2018 | 78       | 78       | 97                 | 63                 |
| Aug 2018 | 80       | 79       | 99                 | 64                 |
| Sep 2018 | 76       | 79       | 99                 | 64                 |
| Oct 2018 | 72       | 78       | 98                 | 63                 |
| Nov 2018 | 74       | 76       | 96                 | 61                 |
| Dec 2018 | 72       | 75       | 95                 | 60                 |
| Jan 2019 | 69       | 74       | 94                 | 59                 |
| Feb 2019 | 71       | 74       | 93                 | 59                 |
| Mar 2019 | 68       | 73       | 92                 | 58                 |
| Apr 2019 | 67       | 72       | 91                 | 57                 |
| May 2019 | 70       | 72       | 92                 | 58                 |
| Jun 2019 | 67       | 73       | 92                 | 58                 |
| Jul 2019 | 71       | 73       | 93                 | 59                 |
| Aug 2019 | 74       | 74       | 93                 | 59                 |
| Sep 2019 | 72       | 74       | 93                 | 59                 |
| Oct 2019 | 68       | 72       | 91                 | 57                 |
| Nov 2019 | 69       | 70       | 88                 | 55                 |

| <b>Month</b> | <b>Observed</b> | <b>Expected</b> | <b>95% PI Upper Limit</b> | <b>95% PI Lower Limit</b> |
|--------------|-----------------|-----------------|---------------------------|---------------------------|
| Dec 2019     | 69              | 70              | 88                        | 55                        |
| Jan 2020     | 68              | 68              | 87                        | 54                        |
| Feb 2020     | 66              | 68              | 86                        | 53                        |
| Mar 2020     | 66              | 67              | 85                        | 53                        |
| Apr 2020     | 67              | 67              | 85                        | 53                        |
| May 2020     | 65              | 67              | 85                        | 53                        |
| Jun 2020     | 67              | 68              | 86                        | 53                        |
| Jul 2020     | 68              | 69              | 87                        | 54                        |
| Aug 2020     | 67              | 70              | 88                        | 55                        |
| Sep 2020     | 71              | 69              | 87                        | 54                        |
| Oct 2020     | 64              | 67              | 85                        | 53                        |
| Nov 2020     | 65              | 66              | 84                        | 52                        |
| Dec 2020     | 62              | 65              | 83                        | 51                        |
| Jan 2021     | 62              | 64              | 82                        | 50                        |
| Feb 2021     | 60              | 63              | 81                        | 49                        |
| Mar 2021     | 69              | 62              | 80                        | 49                        |
| Apr 2021     | 67              | 62              | 80                        | 48                        |
| May 2021     | 65              | 62              | 80                        | 48                        |

**eTable 27.** Observed and expected daily number of total births, by month, with 95% prediction intervals between January 2017 and May 2021, Tohoku.

| Month    | Observed | Expected | 95% PI Upper Limit | 95% PI Lower Limit |
|----------|----------|----------|--------------------|--------------------|
| Jan 2017 | 170      | 173      | 205                | 152                |
| Feb 2017 | 169      | 172      | 203                | 151                |
| Mar 2017 | 166      | 172      | 202                | 150                |
| Apr 2017 | 164      | 175      | 207                | 154                |
| May 2017 | 177      | 176      | 208                | 155                |
| Jun 2017 | 169      | 178      | 209                | 156                |
| Jul 2017 | 172      | 179      | 211                | 158                |
| Aug 2017 | 178      | 182      | 215                | 161                |
| Sep 2017 | 182      | 182      | 214                | 160                |
| Oct 2017 | 172      | 177      | 210                | 157                |
| Nov 2017 | 167      | 169      | 200                | 149                |
| Dec 2017 | 162      | 167      | 197                | 146                |
| Jan 2018 | 164      | 163      | 194                | 143                |
| Feb 2018 | 160      | 162      | 192                | 141                |
| Mar 2018 | 151      | 162      | 192                | 142                |
| Apr 2018 | 162      | 165      | 196                | 145                |
| May 2018 | 171      | 166      | 196                | 145                |
| Jun 2018 | 167      | 167      | 198                | 146                |
| Jul 2018 | 167      | 168      | 200                | 148                |
| Aug 2018 | 168      | 172      | 203                | 151                |
| Sep 2018 | 166      | 172      | 202                | 150                |
| Oct 2018 | 166      | 167      | 199                | 147                |
| Nov 2018 | 162      | 160      | 191                | 140                |
| Dec 2018 | 150      | 159      | 189                | 139                |
| Jan 2019 | 147      | 155      | 185                | 136                |
| Feb 2019 | 147      | 155      | 184                | 135                |
| Mar 2019 | 145      | 155      | 184                | 135                |
| Apr 2019 | 152      | 156      | 186                | 136                |
| May 2019 | 161      | 158      | 188                | 138                |
| Jun 2019 | 150      | 160      | 189                | 139                |
| Jul 2019 | 159      | 159      | 189                | 139                |
| Aug 2019 | 153      | 161      | 191                | 141                |
| Sep 2019 | 155      | 160      | 189                | 139                |
| Oct 2019 | 151      | 156      | 186                | 136                |
| Nov 2019 | 140      | 149      | 178                | 129                |

| <b>Month</b> | <b>Observed</b> | <b>Expected</b> | <b>95% PI Upper Limit</b> | <b>95% PI Lower Limit</b> |
|--------------|-----------------|-----------------|---------------------------|---------------------------|
| Dec 2019     | 139             | 148             | 176                       | 128                       |
| Jan 2020     | 146             | 143             | 171                       | 123                       |
| Feb 2020     | 137             | 143             | 170                       | 123                       |
| Mar 2020     | 139             | 143             | 170                       | 123                       |
| Apr 2020     | 152             | 145             | 173                       | 125                       |
| May 2020     | 141             | 147             | 175                       | 127                       |
| Jun 2020     | 151             | 148             | 176                       | 128                       |
| Jul 2020     | 152             | 147             | 175                       | 127                       |
| Aug 2020     | 145             | 149             | 177                       | 129                       |
| Sep 2020     | 155             | 148             | 175                       | 127                       |
| Oct 2020     | 145             | 144             | 173                       | 125                       |
| Nov 2020     | 136             | 139             | 166                       | 119                       |
| Dec 2020     | 131             | 137             | 164                       | 117                       |
| Jan 2021     | 123             | 133             | 160                       | 114                       |
| Feb 2021     | 129             | 133             | 160                       | 114                       |
| Mar 2021     | 132             | 133             | 160                       | 114                       |
| Apr 2021     | 146             | 136             | 164                       | 117                       |
| May 2021     | 137             | 138             | 166                       | 119                       |

**eFigure 1.** Observed and expected daily number of first births, by month, with 95% prediction intervals between January 2017 and May 2021, Japan.

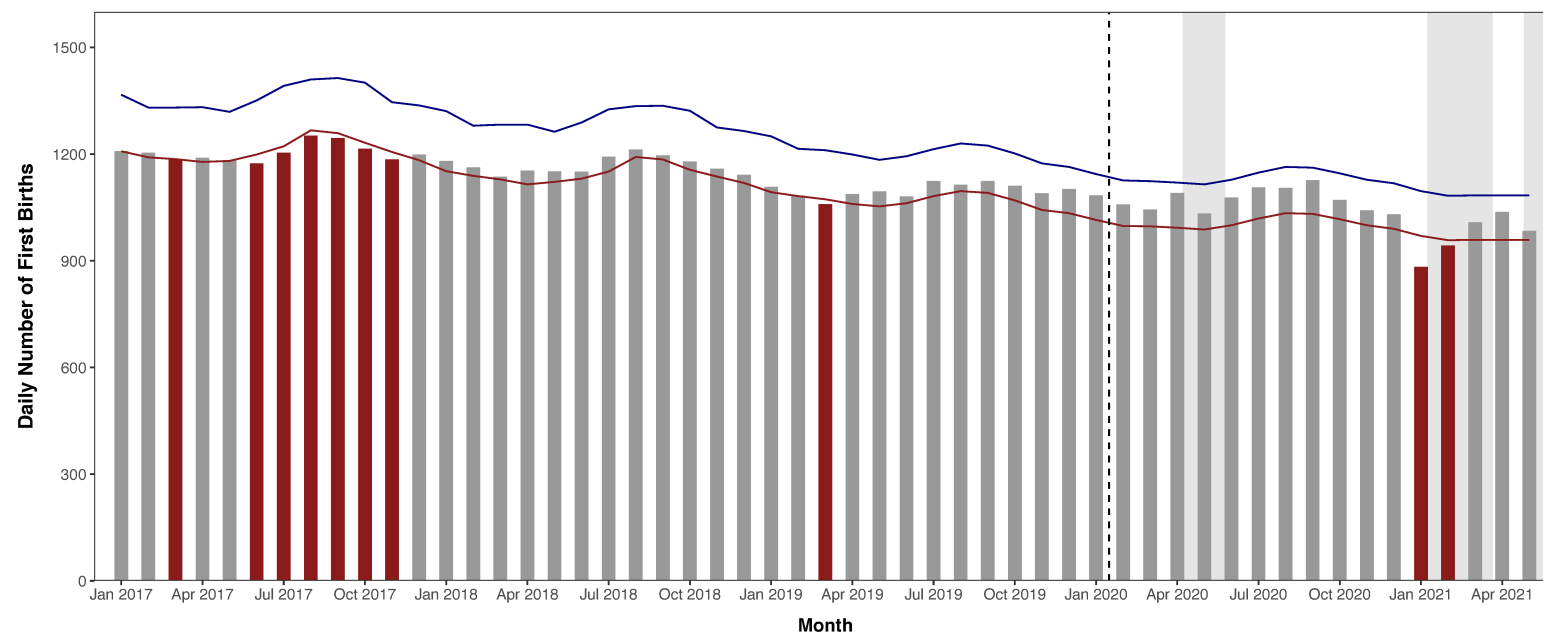

The blue and red lines represent the upper and lower thresholds, respectively, of the 95% prediction interval around the expected value for any given month. Red bars indicate observed values significantly lower than predicted (observed < 95% PI lower limit). Grey shading corresponds to states of emergency in the Tokyo area. The dotted black line denotes the start of the COVID-19 pandemic.



**eFigure 2.** Observed and expected daily number of subsequent births, by month, with 95% prediction intervals between January 2017 and May 2021, Japan.

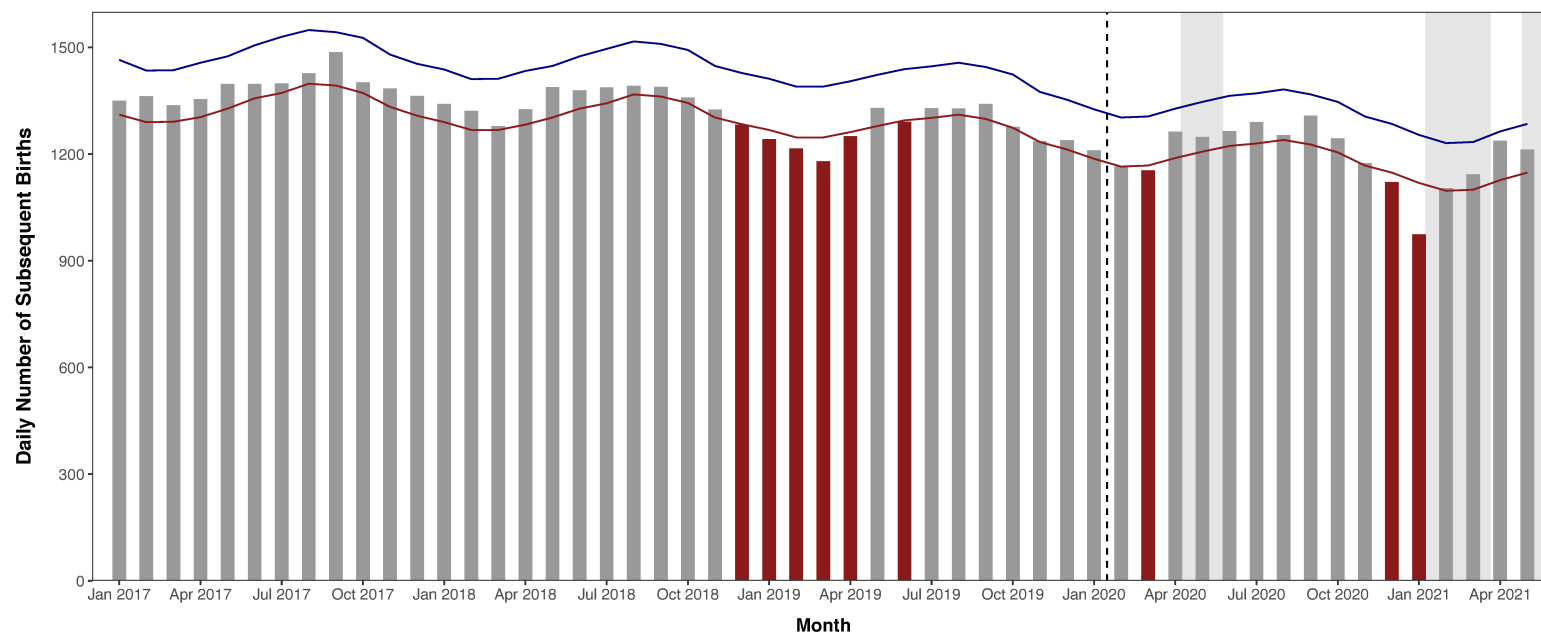

The blue and red lines represent the upper and lower thresholds, respectively, of the 95% prediction interval around the expected value for any given month. Red bars indicate observed values significantly lower than predicted (observed < 95% PI lower limit). Grey shading corresponds to states of emergency in the Tokyo area. The dotted black line denotes the start of the COVID-19 pandemic.
